# Supplementary material for: Evolution of the Cell Wall Gene Families of Grasses
Source: PubMed Central journal article supplement (PMC6805987; doi:10.3389/fpls.2019.01205), 2019-10-04
Supplement: DataSheet_2.pdf [file DataSheet_2.pdf]

**Table S1. Cell wall-related genes of maize B73 and their expression in developing stems.** Expression ratio is calculated for genes with  $\geq 500$  reads per 20 M as the sum of the reads of Internodes 4 and 5 divided by the sum of reads of Internodes 6 and 8. Arabidopsis genes are color-coded to reflect expression during floral stem development as primarily during primary wall formation (blue), secondary wall formation (red), or constitutive (purple). Putative orthologous maize genes closest in sequence to Arabidopsis and expressed during primary wall formation (blue) or secondary wall formation (red) and the Arabidopsis homologs are in bold.

| Family                                  | Maize GDBv2   | Ratio of Expression | Potential Arabidopsis Orthologs                        | Total Expression Internodes 4-8 Reads per 20 M |
|-----------------------------------------|---------------|---------------------|--------------------------------------------------------|------------------------------------------------|
| <b>Sucrose synthases</b>                |               |                     |                                                        |                                                |
| <b>Sus6a</b>                            | GRMZM2G045171 | 0.06                | At5g37180, <b>At1g73370</b>                            | 586                                            |
| <b>Sus6b</b>                            | GRMZM2G060659 | 0.08                | At5g37180, <b>At1g73370</b>                            | 3,799                                          |
| <b>Sus4a</b>                            | GRMZM2G152908 | 0.42                | <b>At5g20830</b> , <b>At3g43190</b>                    | 453,510                                        |
| SusL3                                   | GRMZM2G011240 | 0.44                | None                                                   | 944                                            |
| <b>Sus4b</b>                            | GRMZM2G089713 | 1.32                | <b>At5g20830</b> , <b>At3g43190</b>                    | 1,676                                          |
| SusL1                                   | GRMZM2G318780 | 1.73                | None                                                   | 4,572                                          |
| SusL2                                   | GRMZM2G392988 | 1.90                | None                                                   | 1,936                                          |
| Sus3                                    | GRMZM2G311182 | 2.77                | <b>At4g02280</b>                                       | 3,211                                          |
| <b>Nucleotide-sugar interconversion</b> |               |                     |                                                        |                                                |
| AUD1c                                   | GRMZM2G007404 | 1.16                | At3g62830, <b>At2g47650</b>                            | 4,254                                          |
| AUD1b                                   | GRMZM2G007195 | 2.00                | At3g62830, <b>At2g47650</b>                            | 26,065                                         |
| AUD1a                                   | GRMZM2G381473 | 2.45                | At3g62830, <b>At2g47650</b>                            | 1,023                                          |
| AUD3c                                   | GRMZM2G359234 | 3.37                | <b>At3g53520</b>                                       | 19,639                                         |
| AUD3b                                   | GRMZM2G370048 | 3.73                | <b>At3g53520</b>                                       | 14,561                                         |
| AUD3a                                   | GRMZM2G347717 |                     | <b>At3g53520</b>                                       | 149                                            |
| AUD1d                                   | GRMZM2G382038 |                     | None                                                   | 88                                             |
| SUD3b                                   | GRMZM2G165357 | 0.98                | <b>At2g28760</b>                                       | 46,682                                         |
| SUD3a                                   | GRMZM2G044027 | 1.16                | <b>At2g28760</b>                                       | 65,128                                         |
| <b>AXS1</b>                             | GRMZM2G063949 | 0.36                | At1g08200, <b>At2g27860</b>                            | 10,542                                         |
| GAE6e                                   | GRMZM2G052357 | 0.04                | None                                                   | 1,367                                          |
| GAE6b                                   | GRMZM2G170336 | 0.56                | None                                                   | 2,814                                          |
| <b>GAE1b</b>                            | GRMZM2G110558 | 0.60                | <b>At4g30440</b>                                       | 6,346                                          |
| <b>GAE1c</b>                            | GRMZM2G042179 | 0.76                | <b>At4g30440</b>                                       | 4,881                                          |
| GAE6a                                   | GRMZM2G017678 | 1.82                | None                                                   | 1,329                                          |
| GAE6c                                   | GRMZM2G429118 | 4.57                | None                                                   | 1,169                                          |
| GAE6d                                   | GRMZM2G161233 |                     | None                                                   | 110                                            |
| GAE1a                                   | GRMZM2G455306 |                     | <b>At4g30440</b>                                       | 87                                             |
| GAE6f                                   | GRMZM2G163610 |                     | None                                                   | 7                                              |
| GER1                                    | GRMZM2G029856 |                     | <b>At1g17890</b> , <b>At1g73250</b>                    | 22                                             |
| <b>GME1a</b>                            | GRMZM2G138907 | 1.17                | <b>At5g28840</b>                                       | 4,634                                          |
| GME1b                                   | GRMZM2G124434 | 3.13                | <b>At5g28840</b>                                       | 8,356                                          |
| GMD1                                    | GRMZM2G115124 |                     | <b>At3g51160</b> , <b>At5g66280</b>                    | 351                                            |
| RHM1b                                   | GRMZM2G166767 | 0.99                | None                                                   | 11,146                                         |
| RHM1c                                   | GRMZM2G031311 | 1.01                | None                                                   | 918                                            |
| RHM1a                                   | GRMZM2G044281 | 7.14                | None                                                   | 4,703                                          |
| <b>UER1</b>                             | GRMZM2G072911 | 0.56                | <b>At1g63000</b>                                       | 15,571                                         |
| UGD3b                                   | GRMZM5G862540 | 1.26                | <b>At5g15490</b> , <b>At3g29360</b> , <b>At5g39320</b> | 99,923                                         |
| UGD3a                                   | GRMZM2G328500 | 2.24                | <b>At5g15490</b> , <b>At3g29360</b> , <b>At5g39320</b> | 10,479                                         |
| UGD4                                    | GRMZM2G058244 |                     | <b>At1g26570</b>                                       | 147                                            |
| <b>UGE4</b>                             | GRMZM2G138410 | 0.13                | <b>At1g64440</b>                                       | 1,424                                          |
| UGE2                                    | GRMZM2G038598 | 11.92               | <b>At4g23920</b> , <b>At4g10960</b>                    | 1,982                                          |
| UGE3                                    | GRMZM2G052336 |                     | <b>At1g12780</b> , <b>At1g63180</b>                    | 129                                            |
| UXE4b                                   | GRMZM2G000632 | 1.13                | None                                                   | 2,821                                          |
| UXE4c                                   | GRMZM2G040397 | 1.62                | None                                                   | 13,300                                         |
| UXE4a                                   | GRMZM5G830983 | 1.63                | None                                                   | 3,946                                          |
| UXE4d                                   | GRMZM2G145460 |                     | None                                                   | 434                                            |

|                  |               |      |                              |        |
|------------------|---------------|------|------------------------------|--------|
| RGP/UAM5c        | GRMZM2G456174 | 0.49 | None                         | 540    |
| <b>RGP/UAM3a</b> | GRMZM2G045287 | 0.71 | <b>At3g08900</b>             | 3,023  |
| RGP/UAM1a        | GRMZM2G087326 | 2.53 | <b>At3g02230</b> , At5q15650 | 48,636 |
| RGP/UAM5a        | GRMZM2G173341 | 3.04 | <b>At5g16510</b>             | 41,258 |
| RGP/UAM1b        | GRMZM2G073725 | 3.10 | <b>At3g02230</b> , At5q15650 | 78,255 |
| RGP/UAM3b        | GRMZM5G830681 |      | <b>At3g08900</b>             | 461    |
| RGP/UAM5d        | GRMZM2G481027 |      | None                         | 1      |
| RGP/UAM4         | GRMZM2G034945 |      | None                         | 0      |
| RGP/UAM5b        | GRMZM2G046436 |      | None                         | 0      |

### Nucleotide-sugar transporters

#### Group I

|                |                  |      |                                     |        |
|----------------|------------------|------|-------------------------------------|--------|
| <b>UXT3b</b>   | GRMZM2G116053    | 0.60 | <b>At1g06890</b> , <b>At2g30460</b> | 7,912  |
| <b>UXTL2a</b>  | GRMZM2G012992    | 0.75 | <b>At5g55950</b>                    | 1,753  |
| <b>URGT3a</b>  | GRMZM5G823629    | 0.88 | <b>At4g39390</b>                    | 3,348  |
| <b>URGT3b</b>  | GRMZM2G089630    | 0.88 | <b>At4g39390</b>                    | 3,684  |
| <b>UXT3a</b>   | GRMZM2G081848    | 0.94 | <b>At1g06890</b> , <b>At2g30460</b> | 4,375  |
| UXT1a          | GRMZM2G068714    | 1.01 | None                                | 4,905  |
| URGL1          | GRMZM2G147446    | 1.09 | None                                | 3,827  |
| URGL2          | GRMZM2G071378    | 1.11 | None                                | 5,523  |
| <b>UXT2a</b>   | GRMZM2G063253    | 1.16 | <b>At1g06890</b> , <b>At2g30460</b> | 19,870 |
| <b>UXT2b</b>   | GRMZM2G063511    | 1.30 | <b>At1g06890</b> , <b>At2g30460</b> | 17,915 |
| <b>URGT3b'</b> | AC194970.5_FG005 | 1.49 | <b>At5g42420</b>                    | 8,053  |
| UXT1c          | GRMZM5G828581    | 2.52 | None                                | 12,570 |
| URGT3a'        | GRMZM2G055216    | 2.55 | <b>At5g42420</b>                    | 13,691 |
| UXT1d          | GRMZM2G048434    | 2.64 | None                                | 7,472  |
| UXT1b          | GRMZM2G122618    | 3.40 | None                                | 20,006 |
| URGL3          | GRMZM2G021971    |      | None                                | 472    |
| URGL4          | GRMZM2G014610    |      | None                                | 390    |
| UXTL2b         | GRMZM2G075372    |      | <b>At5g55950</b>                    | 313    |

#### Group II

|              |               |      |                                     |       |
|--------------|---------------|------|-------------------------------------|-------|
| <b>UTR1a</b> | GRMZM2G045686 | 0.64 | <b>At2g02810</b> , <b>At1g14360</b> | 630   |
| <b>UTR1b</b> | GRMZM2G176029 | 0.82 | <b>At2g02810</b> , <b>At1g14360</b> | 5,288 |
| <b>UTR5a</b> | GRMZM2G005163 | 0.84 | <b>At3g46180</b> , <b>At5g59740</b> | 818   |
| UTR5b        | GRMZM2G180519 |      | <b>At3g46180</b> , <b>At5g59740</b> | 288   |
| UTR2         | GRMZM2G143187 |      | <b>At1g12600</b> , <b>At4g23010</b> | 169   |

#### Group III

|                |                  |      |                                     |       |
|----------------|------------------|------|-------------------------------------|-------|
| NSTL4b         | AC214266.3_FG002 | 0.14 | At4g35335                           | 952   |
| <b>GONST4a</b> | GRMZM2G088849    | 0.46 | <b>At5g19980</b>                    | 912   |
| UTR6c          | GRMZM5G842886    | 0.73 | None                                | 2,050 |
| <b>GONST3a</b> | GRMZM2G173067    | 0.77 | <b>At1g76340</b>                    | 2,825 |
| <b>GONST4b</b> | GRMZM2G058120    | 0.98 | <b>At5g19980</b>                    | 1,489 |
| <b>UTR6b</b>   | GRMZM2G001033    | 1.20 | <b>At2g43240</b> , <b>At3g59360</b> | 8,715 |
| <b>GONST3b</b> | GRMZM2G013349    | 1.33 | <b>At1g76340</b>                    | 7,825 |
| <b>ROCK1a</b>  | GRMZM2G025236    | 1.49 | <b>At5g65000</b>                    | 3,758 |
| <b>ROCK1b</b>  | GRMZM2G403915    | 1.54 | <b>At5g65000</b>                    | 2,348 |
| <b>UTR6a</b>   | GRMZM2G172647    | 1.66 | <b>At2g43240</b> , <b>At3g59360</b> | 8,231 |
| UGNT1a         | GRMZM2G133226    | 1.98 | At4g32272                           | 4,275 |
| NSTL3          | GRMZM2G093598    | 2.04 | <b>At5g41760</b>                    | 4,103 |
| UTR7a          | GRMZM2G135476    | 2.30 | <b>At4g31600</b>                    | 1,281 |
| UGNT1b         | GRMZM2G020976    | 2.71 | At4g32272                           | 5,206 |
| GONST1         | GRMZM5G863229    | 2.77 | <b>At2g13650</b>                    | 1,523 |
| NSTL4a         | GRMZM2G007909    |      | At4g35335                           | 62    |
| NSTL4c         | GRMZM2G421565    |      | None                                | 52    |
| UTR7c          | GRMZM2G050157    |      | <b>At4g31600</b>                    | 29    |
| UTR7b          | GRMZM2G375847    |      | <b>At4g31600</b>                    | 28    |
| GONST2         | GRMZM2G081105    |      | <b>At1g07290</b>                    | 27    |

#### Group IV

|             |               |      |                  |        |
|-------------|---------------|------|------------------|--------|
| <b>TPTa</b> | GRMZM2G083344 | 0.42 | <b>At5g46110</b> | 7,910  |
| PPT1b       | GRMZM2G103047 | 0.69 | At5g33320        | 9,804  |
| PPT1c       | GRMZM2G047404 | 0.79 | At5g33320        | 14,665 |
| GPT1b       | GRMZM2G180720 | 1.34 | None             | 20,036 |
| GPT1a       | GRMZM2G431314 | 1.40 | None             | 11,170 |
| PPT1a       | GRMZM2G174107 | 1.62 | At5g33320        | 17,856 |
| GPT1c       | GRMZM2G009223 | 2.01 | None             | 4,589  |
| TPTb        | GRMZM2G070605 | 3.36 | <b>At5g46110</b> | 11,184 |
| TPTc        | GRMZM2G059412 | 3.70 | None             | 7,851  |
| PPT2        | GRMZM2G066413 |      | <b>At3g01550</b> | 95     |

#### Group V

|               |               |      |                                     |       |
|---------------|---------------|------|-------------------------------------|-------|
| <b>GalT1a</b> | GRMZM2G127591 | 0.25 | <b>At1g77610</b> , <b>At1g21870</b> | 1,441 |
| UUAT1b        | GRMZM2G443265 | 2.16 | <b>At5g05820</b> , <b>At3g11320</b> | 8,853 |

|                                        |                  |      |                                            |        |
|----------------------------------------|------------------|------|--------------------------------------------|--------|
| UAT1a                                  | GRMZM2G447617    | 2.81 | At5g05820, At3g11320                       | 9,936  |
| <b>GalT1b</b>                          | GRMZM2G040033    | 1.12 | At1g77610, At1g21870                       | 355    |
| NSTL10                                 | AC219006.2_FG006 |      | None                                       | 51     |
| <b>Group VI</b>                        |                  |      |                                            |        |
| <b>UAFT1</b>                           | GRMZM2G002699    | 0.28 | At1g48230, At3g17430                       | 2,705  |
| UAFT2a                                 | GRMZM2G090300    | 0.98 | None                                       | 12,702 |
| UAFT2b                                 | GRMZM2G062555    | 1.12 | None                                       | 8,891  |
| <b>NSTL17</b>                          | GRMZM2G022793    | 1.27 | At1g53660, At3g14410                       | 3,089  |
| UAFT2c                                 | GRMZM2G130558    | 7.37 | None                                       | 11,044 |
| UAFT3                                  | GRMZM2G178734    |      | At1g06470                                  | 479    |
| UAFT2d                                 | AC204359.3_FG005 |      | None                                       | 0      |
| <b>Cellulose synthases</b>             |                  |      |                                            |        |
| <b>CesA8a</b>                          | GRMZM2G082580    | 0.68 | At4g39350, At2g21770, At5g09870, At5g64740 | 15,889 |
| <b>CesA8b</b>                          | GRMZM2G177631    | 0.75 | At4g39350, At2g21770, At5g09870, At5g64740 | 35,371 |
| <b>CesA4</b>                           | GRMZM2G424832    | 0.83 | At4g32410, At2g25540                       | 16,307 |
| <b>CesA3</b>                           | GRMZM2G039454    | 0.85 | At4g32410, At2g25540                       | 9,360  |
| <b>CesA5</b>                           | GRMZM2G111642    | 0.91 | At4g32410, At2g25540                       | 6,272  |
| <b>CesA7b</b>                          | GRMZM2G028353    | 1.00 | At4g39350, At2g21770, At5g09870, At5g64740 | 25,358 |
| <b>CesA7a</b>                          | GRMZM2G025231    | 1.17 | At4g39350, At2g21770, At5g09870, At5g64740 | 44,559 |
| <b>CesA9</b>                           | GRMZM2G018241    | 1.25 | At4g32410, At2g25540                       | 25,287 |
| <b>CesA6</b>                           | GRMZM2G113137    | 1.56 | At4g39350, At2g21770, At5g09870, At5g64740 | 29,711 |
| <b>CesA1</b>                           | GRMZM2G112336    | 1.78 | At4g32410, At2g25540                       | 48,105 |
| <b>CesA2</b>                           | GRMZM2G027723    | 1.85 | At4g32410, At2g25540                       | 59,420 |
| CesAL4                                 | GRMZM2G150404    | 1.97 | At4g32410, At2g25540                       | 9,513  |
| <b>CesA10</b>                          | GRMZM2G445905    | 3.35 | At5g44030                                  | 24,680 |
| <b>CesA12b</b>                         | GRMZM2G002523    | 4.38 | At5g17420                                  | 7,981  |
| <b>CesA11b</b>                         | GRMZM2G055795    | 4.62 | At4g18780                                  | 55,576 |
| <b>CesA11a</b>                         | GRMZM2G037413    | 4.62 | At4g18780                                  | 55,656 |
| <b>CesA12a</b>                         | GRMZM2G142898    | 5.94 | At5g17420                                  | 10,761 |
| CesAL1                                 | GRMZM2G104092    |      | At4g32410, At2g25540                       | 479    |
| CesAL3                                 | GRMZM2G378836    |      | At4g32410, At2g25540                       | 113    |
| CesAL2                                 | GRMZM2G349834    |      | At4g18780                                  | 10     |
| <b>Cellulose-synthase-like genes</b>   |                  |      |                                            |        |
| <b>Cellulose synthase-likeA (CslA)</b> |                  |      |                                            |        |
| CsIAL1                                 | GRMZM2G010142    | 0.16 | None                                       | 1,447  |
| <b>CsIA2</b>                           | GRMZM2G105631    | 0.24 | At5g22740                                  | 9,071  |
| CsIAL2                                 | GRMZM2G115772    | 0.31 | None                                       | 1,566  |
| CsIAL5                                 | GRMZM2G020742    | 0.37 | None                                       | 752    |
| CsIAL4                                 | GRMZM2G405567    | 0.42 | None                                       | 931    |
| CsIAL7                                 | GRMZM2G099088    | 0.45 | None                                       | 3,021  |
| CsIAL3                                 | GRMZM2G178880    | 0.49 | None                                       | 726    |
| CsIAL6                                 | GRMZM2G108600    | 0.56 | None                                       | 2,808  |
| CsIA9                                  | GRMZM2G443715    | 1.08 | At5g03760                                  | 1,118  |
| CsIAL8                                 | GRMZM2G107754    |      | None                                       | 255    |
| <b>Cellulose synthase-likeC (CslC)</b> |                  |      |                                            |        |
| CslC12e                                | GRMZM2G454081    | 0.37 | None                                       | 2,471  |
| CslC12d                                | GRMZM2G027794    | 0.47 | None                                       | 2,382  |
| <b>CslC5a</b>                          | GRMZM2G173759    | 0.53 | At4g31590, At2g24630                       | 5,931  |
| CslC12a                                | GRMZM2G028286    | 0.71 | At4g07960                                  | 6,244  |
| CslC12b                                | AC183932.3_FG007 | 0.81 | None                                       | 5,097  |
| CslC12c                                | GRMZM2G074792    | 0.83 | None                                       | 12,428 |
| CslC5b                                 | GRMZM2G142685    |      | At4g31590, At2g24630                       | 55     |
| CslC5c                                 | GRMZM2G135286    |      | At4g31590, At2g24630                       | 9      |
| <b>Cellulose synthase-likeD (CslD)</b> |                  |      |                                            |        |
| <b>CslD5</b>                           | GRMZM2G015886    | 0.12 | At1g02730                                  | 2,674  |
| CslD3a                                 | GRMZM5G870176    | 2.25 | At3g03050                                  | 26,251 |
| CslD4                                  | GRMZM2G044269    |      | At4g38190                                  | 187    |
| CslD1                                  | GRMZM2G061764    |      | At3g03050                                  | 166    |
| CslD3b                                 | GRMZM2G436299    |      | At2g33100                                  | 156    |
| <b>Cellulose synthase-likeE (CslE)</b> |                  |      |                                            |        |
| <b>CslE1a</b>                          | GRMZM2G014558    | 0.01 | At1g55850                                  | 516    |
| <b>CslE1b</b>                          | GRMZM2G012044    | 1.83 | At1g55850                                  | 1,520  |
| <b>Cellulose synthase-likeF (CslF)</b> |                  |      |                                            |        |
| CslF3                                  | GRMZM2G113432    | 0.05 | None                                       | 1,024  |
| CslF7                                  | GRMZM2G339645    | 0.72 | None                                       | 996    |
| CslF2                                  | GRMZM2G110145    | 0.90 | None                                       | 20,841 |
| CslF4                                  | GRMZM2G122277    | 0.98 | None                                       | 21,783 |
| CslF5                                  | GRMZM2G150404    | 1.97 | None                                       | 9,513  |
| CslF8                                  | GRMZM2G367267    |      | None                                       | 181    |

|                                            |                  |       |                                            |        |
|--------------------------------------------|------------------|-------|--------------------------------------------|--------|
| CsIF9                                      | GRMZM2G378836    |       | None                                       | 113    |
| CsIF1                                      | GRMZM2G103972    |       | None                                       | 37     |
| CsIF6                                      | GRMZM2G164761    |       | None                                       | 7      |
| <b>Cellulose synthase-likeG (CsIG)</b>     |                  |       |                                            |        |
| CsIG1                                      | GRMZM2G122431    |       | At4g23990                                  | 55     |
| <b>Callose synthases</b>                   |                  |       |                                            |        |
| <b>GSL1</b>                                | GRMZM2G022856    | 0.13  | At4g04970                                  | 3,323  |
| <b>GSL12b</b>                              | GRMZM2G430680    | 0.13  | At5g13000, At5g36870, At2g31960, At1g05570 | 7,585  |
| GSL12d                                     | GRMZM2G111529    | 0.17  | None                                       | 1,563  |
| <b>GSL7a</b>                               | GRMZM2G084802    | 0.50  | At1g06490, At3g59100                       | 2,270  |
| <b>GSL7b</b>                               | GRMZM2G465764    | 0.60  | At1g06490, At3g59100                       | 4,337  |
| <b>GSL8</b>                                | GRMZM2G326643    | 0.75  | At2g36850                                  | 15,807 |
| <b>GSL12a</b>                              | GRMZM5G840560    | 1.15  | At5g13000, At5g36870, At2g31960, At1g05570 | 7,111  |
| GSL12f                                     | GRMZM2G453794    | 1.37  | None                                       | 12,463 |
| GSL12c                                     | GRMZM2G180951    | 4.81  | None                                       | 5,832  |
| GSL12e                                     | GRMZM2G341918    | 5.04  | None                                       | 702    |
| GSL2                                       | GRMZM2G353905    |       | At2g13680                                  | 285    |
| GSL12g                                     | GRMZM2G023003    |       | None                                       | 187    |
| <b>Glycosyl Transferase Family 8 (GT8)</b> |                  |       |                                            |        |
| <b>Group A</b>                             |                  |       |                                            |        |
| <b>GUX1b</b>                               | GRMZM2G002023    | 0.23  | At3g18660, At1g77130                       | 5,810  |
| <b>GUX1a</b>                               | GRMZM2G058472    | 0.64  | At3g18660, At1g77130                       | 1,142  |
| GUX1c                                      | GRMZM2G365544    | 1.11  | At3g18660, At1g77130                       | 7,863  |
| GUX1d                                      | GRMZM2G135743    | 1.29  | At3g18660, At1g77130                       | 14,060 |
| GUX2                                       | GRMZM2G109431    |       | At4g33330                                  | 429    |
| GUX1e                                      | GRMZM2G031581    |       | None                                       | 111    |
| GUX1f                                      | GRMZM2G441987    |       | None                                       | 15     |
| <b>Group C</b>                             |                  |       |                                            |        |
| GATL7c                                     | GRMZM2G000587    | 0.11  | None                                       | 1,200  |
| <b>GATL3a</b>                              | GRMZM2G057930    | 0.23  | At1g13250                                  | 513    |
| GATL7d                                     | GRMZM2G142709    | 0.80  | None                                       | 4,318  |
| <b>GATL2</b>                               | GRMZM2G149024    | 1.14  | At3g50760, At1g19300                       | 4,125  |
| <b>GATL3b</b>                              | GRMZM2G468661    | 1.21  | At1g13250                                  | 563    |
| GATL7b                                     | GRMZM2G300692    | 3.25  | At3g62660, At4g02130, At1g02720            | 2,325  |
| GATL4a                                     | GRMZM2G108576    |       | At3g06260                                  | 327    |
| GATL4b                                     | GRMZM2G019583    |       | At3g06260                                  | 81     |
| GATL7a                                     | GRMZM2G443785    |       | At3g62660, At4g02130, At1g02720            | 3      |
| GATL7e                                     | GRMZM2G469828    |       | None                                       | 0      |
| <b>Group D</b>                             |                  |       |                                            |        |
| <b>GAUT7a</b>                              | GRMZM2G036918    | 0.22  | At2g38650                                  | 4,931  |
| GAUT9a                                     | AC209664.3_FG002 | 0.30  | None                                       | 1,935  |
| <b>GAUT1d</b>                              | GRMZM2G076276    | 0.31  | At3g61130                                  | 3,610  |
| <b>GAUT1a</b>                              | GRMZM2G386971    | 0.37  | At3g61130                                  | 5,846  |
| <b>GAUT7c</b>                              | GRMZM2G045467    | 0.38  | At2g38650                                  | 2,095  |
| <b>GAUT1c</b>                              | GRMZM2G147145    | 0.42  | At3g61130                                  | 5,517  |
| <b>GAUT15</b>                              | GRMZM2G014770    | 0.46  | At3g58790                                  | 1,313  |
| <b>GAUT7b</b>                              | GRMZM2G008501    | 0.56  | At2g38650                                  | 2,798  |
| <b>GAUT13b</b>                             | GRMZM2G107854    | 0.58  | At3g01040, At5g15470                       | 2,518  |
| <b>GAUT1b</b>                              | GRMZM2G379577    | 0.58  | At3g61130                                  | 3,230  |
| <b>GAUT6</b>                               | GRMZM2G135195    | 0.60  | At2g30575, At1g06780                       | 1,648  |
| <b>GAUT4b</b>                              | GRMZM2G048008    | 0.60  | At5g47780                                  | 1,644  |
| <b>GAUT13c</b>                             | GRMZM2G113506    | 0.76  | At3g01040, At5g15470                       | 5,321  |
| <b>GAUT8</b>                               | GRMZM2G130046    | 0.81  | At3g25140                                  | 8,229  |
| <b>GAUT10b</b>                             | GRMZM2G143102    | 0.86  | At2g20810                                  | 2,732  |
| <b>GAUT3</b>                               | GRMZM2G028501    | 0.97  | At4g38270                                  | 1,383  |
| <b>GAUT13a</b>                             | GRMZM2G098434    | 1.06  | At3g01040, At5g15470                       | 6,526  |
| <b>GAUT4a</b>                              | GRMZM2G391000    | 1.39  | At5g47780                                  | 7,202  |
| <b>GAUT10a</b>                             | GRMZM2G063519    | 1.46  | At2g20810                                  | 2,381  |
| GAUT11b                                    | AC177908.3_FG002 | 2.62  | At1g18580                                  | 4,342  |
| GAUT11c                                    | GRMZM2G078890    | 3.01  | At1g18580                                  | 2,440  |
| GAUT11a                                    | GRMZM2G151015    |       | At1g18580                                  | 324    |
| GAUT9b                                     | GRMZM2G166940    |       | At3g25140, At3g02350                       | 171    |
| <b>Group E</b>                             |                  |       |                                            |        |
| <b>IPUT1</b>                               | GRMZM2G166903    | 1.79  | At5g18480                                  | 6,896  |
| PGSIP7a                                    | GRMZM2G091581    | 2.42  | At2g35710, At4g16600                       | 6,688  |
| PGSIP7b                                    | GRMZM2G462261    | 1.85  | At2g35710, At4g16600                       | 7,729  |
| PGSIP7c                                    | GRMZM2G114772    | 13.05 | At2g35710, At4g16600                       | 2,004  |
| PGSIP7d                                    | GRMZM2G026889    | 10.15 | At2g35710, At4g16600                       | 989    |

**Glycosyl Transferase Family 31 (GT31)****Group A**

|               |               |      |                                        |       |
|---------------|---------------|------|----------------------------------------|-------|
| <b>GT31A1</b> | GRMZM2G059013 | 0.37 | <b>At1g33250</b>                       | 1,157 |
| GT31A8        | GRMZM2G426067 | 0.42 | None                                   | 571   |
| GT31A9        | GRMZM2G107501 | 0.47 | None                                   | 527   |
| GT31A10       | GRMZM2G061202 | 1.39 | <b>At3g11420, At2g37730</b>            | 3,565 |
| GT31A3        | GRMZM2G017533 | 3.60 | <b>At4g15240, At1g05280</b>            | 1,991 |
| GT31A6        | GRMZM2G102657 |      | None                                   | 383   |
| GT31A7        | GRMZM2G098676 |      | None                                   | 345   |
| GT31A2        | GRMZM2G103785 |      | <b>At4g15240, At1g05280</b>            | 337   |
| GT31A4        | GRMZM2G040068 |      | <b>At5g41460, At4g23490, At4g11350</b> | 15    |
| GT31A5        | GRMZM2G071325 |      | <b>At5g41460, At4g23490, At4g11350</b> | 11    |

**Group B**

|               |                  |      |                                        |       |
|---------------|------------------|------|----------------------------------------|-------|
| <b>GALT2b</b> | GRMZM2G131329    | 0.32 | <b>At4g21060</b>                       | 1,406 |
| GALT4f        | GRMZM2G149935    | 0.39 | None                                   | 3,305 |
| <b>GALT3</b>  | GRMZM2G160958    | 0.57 | <b>At3g06440</b>                       | 2,172 |
| <b>GALT2a</b> | GRMZM2G063688    | 0.58 | <b>At4g21060</b>                       | 2,648 |
| GALT1a        | GRMZM2G042607    | 0.81 | At1g26810                              | 2,871 |
| GALT1b        | GRMZM2G164072    | 0.95 | At1g26810                              | 3,166 |
| GALT4e        | GRMZM2G176630    | 1.81 | None                                   | 3,341 |
| <b>GALT4c</b> | GRMZM2G054350    | 1.90 | <b>At1g27120, At1g74800, At5g62620</b> | 902   |
| GALT4d        | GRMZM2G176774    |      | <b>At1g27120, At1g74800, At5g62620</b> | 452   |
| GALT4a        | GRMZM2G149841    |      | <b>At1g27120, At1g74800, At5g62620</b> | 245   |
| GALT1c        | AC206332.3_FG005 |      | None                                   | 44    |
| GALT4b        | GRMZM2G025048    |      | <b>At1g27120, At1g74800, At5g62620</b> | 17    |

**Group C**

|               |               |      |                             |       |
|---------------|---------------|------|-----------------------------|-------|
| <b>GT31C2</b> | GRMZM2G130449 | 0.71 | <b>At1g53290, At3g14960</b> | 2,761 |
| GT31C1        | GRMZM2G022768 | 0.90 | At2g26100                   | 3,744 |
| <b>GT31C3</b> | GRMZM5G838414 | 1.26 | <b>At1g53290, At3g14960</b> | 1,969 |

**Group D**

|               |               |      |                             |       |
|---------------|---------------|------|-----------------------------|-------|
| <b>HPGT2</b>  | GRMZM2G000393 | 0.23 | <b>At4g32120, At2g25300</b> | 2,837 |
| <b>HPGT1a</b> | GRMZM2G116971 | 0.67 | <b>At5g53340</b>            | 2,953 |
| <b>HPGT1b</b> | GRMZM2G153760 | 0.87 | <b>At5g53340</b>            | 3,793 |

**Group E**

|                |               |      |                                        |       |
|----------------|---------------|------|----------------------------------------|-------|
| <b>GALT31A</b> | GRMZM2G144873 | 0.31 | <b>At1g32930</b>                       | 2,931 |
| <b>GT31E3</b>  | GRMZM2G007185 | 0.38 | <b>At1g11730</b>                       | 649   |
| GT31E2         | GRMZM2G132866 | 0.94 | At1g11730                              | 7,537 |
| <b>GT31E6</b>  | GRMZM2G070708 | 0.97 | <b>At1g77810, At1g22015, At1g33430</b> | 2,727 |
| <b>GT31E5</b>  | GRMZM2G013079 | 1.10 | <b>At1g77810, At1g22015, At1g33430</b> | 2,567 |
| GT31E1         | GRMZM2G080231 | 1.49 | <b>At4g26940, At2g32430, At1g05170</b> | 894   |
| GT31E4         | GRMZM2G133613 |      | <b>At1g77810, At1g22015, At1g33430</b> | 341   |

**Group F**

|        |               |       |      |       |
|--------|---------------|-------|------|-------|
| GT31F4 | GRMZM2G072406 | 10.12 | None | 1,303 |
| GT31F5 | GRMZM2G057779 | 58.15 | None | 1,691 |
| GT31F1 | GRMZM2G037998 |       | None | 116   |
| GT31F2 | GRMZM2G181358 |       | None | 5     |
| GT31F3 | GRMZM2G011626 |       | None | 2     |

**Glycosyl Transferase Family34 (GT34)**

|              |                  |      |                                        |       |
|--------------|------------------|------|----------------------------------------|-------|
| <b>XXT2b</b> | GRMZM2G129302    | 0.19 | <b>At3g62720, At4g02500</b>            | 708   |
| <b>XXTL2</b> | GRMZM2G154124    | 0.36 | <b>At4g37960</b>                       | 2,215 |
| <b>XXT3a</b> | GRMZM5G876303    | 0.76 | <b>At5g07720, At1g18690, At1g74380</b> | 637   |
| XXT2c        | GRMZM2G115762    |      | <b>At3g62720, At4g02500</b>            | 373   |
| XXTL1b       | GRMZM2G123355    |      | <b>At2g22900</b>                       | 353   |
| XXT2a        | GRMZM2G031453    |      | <b>At3g62720, At4g02500</b>            | 137   |
| XXTL1c       | GRMZM2G435120    |      | <b>At2g22900</b>                       | 55    |
| GT34-3       | GRMZM2G072589    |      | None                                   | 20    |
| XXT3f        | GRMZM2G159208    |      | None                                   | 11    |
| XXT3e        | GRMZM2G044394    |      | None                                   | 10    |
| XXT3d        | GRMZM2G445201    |      | None                                   | 8     |
| XXT3c        | GRMZM2G159193    |      | <b>At5g07720, At1g18690, At1g74380</b> | 6     |
| GT34-2       | GRMZM2G383790    |      | None                                   | 4     |
| XXT3b        | GRMZM2G044377    |      | <b>At5g07720, At1g18690, At1g74380</b> | 4     |
| XXTL1d       | GRMZM2G423930    |      | <b>At2g22900</b>                       | 3     |
| GT34-1       | GRMZM2G164283    |      | None                                   | 1     |
| GT34-4       | GRMZM2G434155    |      | None                                   | 0     |
| XXTL1a       | AC186147.3_FG008 |      | <b>At2g22900</b>                       | 0     |

**Glycosyl Transferase Family 37 (GT37)**

|             |               |      |                  |       |
|-------------|---------------|------|------------------|-------|
| <b>FUT2</b> | GRMZM2G404762 | 0.21 | <b>At2g03210</b> | 758   |
| FUTL11      | GRMZM2G015983 | 7.13 | None             | 1,642 |



|        |               |  |                           |     |
|--------|---------------|--|---------------------------|-----|
| FUT3a  | GRMZM2G103128 |  | <a href="#">At1g74420</a> | 261 |
| FUTL2  | GRMZM5G870571 |  | None                      | 133 |
| FUT3b  | GRMZM2G118312 |  | <a href="#">At1g74420</a> | 75  |
| FUTL4  | GRMZM5G858456 |  | None                      | 58  |
| FUTL8  | GRMZM2G104032 |  | None                      | 38  |
| FUTL3  | GRMZM2G127184 |  | None                      | 36  |
| FUTL9  | GRMZM2G387087 |  | None                      | 26  |
| FUTL7  | GRMZM2G470010 |  | None                      | 11  |
| FUTL1  | GRMZM2G436950 |  | None                      | 9   |
| FUTL12 | GRMZM2G080696 |  | None                      | 9   |
| FUTL5  | GRMZM2G015654 |  | None                      | 7   |
| FUTL6  | GRMZM2G333274 |  | None                      | 4   |
| FUTL10 | GRMZM2G096268 |  | None                      | 0   |
| FUT3c  | GRMZM5G857459 |  | None                      | 0   |
| FUT3d  | GRMZM2G471594 |  | None                      | 0   |

#### Glycosyl Transferase Family43 (GT43)

|               |               |      |                                                       |        |
|---------------|---------------|------|-------------------------------------------------------|--------|
| IRX9Le        | GRMZM2G150264 | 1.10 | None                                                  | 2,008  |
| IRX14d        | GRMZM2G160585 | 1.24 | <a href="#">At5q67230</a> , <a href="#">At4q36890</a> | 15,002 |
| IRX9Lb        | GRMZM2G068350 | 1.27 | <a href="#">At1g27600</a>                             | 1,362  |
| IRX9c         | GRMZM2G012874 | 1.63 | <a href="#">At2g37090</a>                             | 6,589  |
| IRX9Ld        | GRMZM2G103628 | 1.73 | None                                                  | 6,078  |
| IRX9Lc        | GRMZM2G037469 | 1.90 | None                                                  | 3,981  |
| IRX9La        | GRMZM2G179504 | 2.06 | <a href="#">At1g27600</a>                             | 531    |
| <b>IRX14b</b> | GRMZM2G150302 | 2.27 | <a href="#">At5q67230</a> , <a href="#">At4q36890</a> | 7,031  |
| IRX14c        | GRMZM5G869532 | 2.50 | <a href="#">At5g67230</a> , <a href="#">At4q36890</a> | 1,126  |
| <b>IRX9a</b>  | GRMZM2G118959 | 2.92 | <a href="#">At2g37090</a>                             | 2,901  |
| <b>IRX9b</b>  | GRMZM2G001079 | 3.01 | <a href="#">At2g37090</a>                             | 7,025  |
| <b>IRX14a</b> | GRMZM2G113655 | 3.19 | <a href="#">At5q67230</a> , <a href="#">At4q36890</a> | 15,022 |
| IRX9d         | GRMZM2G076307 |      | None                                                  | 336    |
| IRX9Lg        | GRMZM2G356579 |      | None                                                  | 153    |
| IRX9Lh        | GRMZM2G025302 |      | None                                                  | 22     |
| IRX9Lf        | GRMZM2G448938 |      | None                                                  | 1      |

#### Glycosyl Transferase Family47 (GT47)

##### Group A

|                |                  |      |                           |       |
|----------------|------------------|------|---------------------------|-------|
| <b>MUR3a</b>   | GRMZM2G137779    | 0.67 | <a href="#">At2g20370</a> | 626   |
| <b>MUR3b</b>   | GRMZM2G430995    | 0.72 | <a href="#">At2g20370</a> | 1,340 |
| <b>MUR3c</b>   | GRMZM2G332548    | 0.97 | <a href="#">At2g20370</a> | 2,979 |
| <b>GT47A14</b> | GRMZM2G089248    | 1.68 | <a href="#">At4g22580</a> | 670   |
| GT47A16        | GRMZM2G021401    |      | <a href="#">At4g22580</a> | 137   |
| GT47A13        | GRMZM2G161540    |      | <a href="#">At4g22580</a> | 47    |
| GT47A11        | GRMZM2G317731    |      | None                      | 29    |
| GT47A18a       | GRMZM2G303135    |      | <a href="#">At5g62220</a> | 26    |
| GT47A4         | GRMZM5G865819    |      | None                      | 20    |
| GT47A10        | GRMZM2G464680    |      | None                      | 16    |
| GT47A9         | GRMZM2G075436    |      | None                      | 9     |
| GT47A18b       | GRMZM2G305146    |      | <a href="#">At5g62220</a> | 7     |
| MUR3d          | GRMZM2G075492    |      | <a href="#">At2g20370</a> | 5     |
| MUR3e          | GRMZM2G016338    |      | <a href="#">At2g20370</a> | 5     |
| GT47A7         | GRMZM2G470309    |      | None                      | 0     |
| GT47A8         | GRMZM2G406662    |      | None                      | 0     |
| GT47A15        | GRMZM2G175417    |      | <a href="#">At4g22580</a> | 0     |
| GT47A1         | GRMZM2G172602    |      | None                      | 0     |
| GT47A2         | GRMZM5G827810    |      | None                      | 0     |
| GT47A3         | GRMZM2G142214    |      | None                      | 0     |
| GT47A5         | GRMZM2G315692    |      | None                      | 0     |
| GT47A6         | GRMZM2G435276    |      | None                      | 0     |
| GT47A12        | AC177899.2_FG009 |      | None                      | 0     |

##### Group B

|               |               |      |                                                       |       |
|---------------|---------------|------|-------------------------------------------------------|-------|
| EDA5d         | GRMZM2G022398 | 0.29 | <a href="#">At5g03795</a>                             | 958   |
| EDA5c         | GRMZM2G009690 | 0.46 | <a href="#">At3g03650</a> , <a href="#">At3g45400</a> | 502   |
| GT47B3        | GRMZM2G139691 | 0.55 | <a href="#">At5g16890</a>                             | 1,505 |
| <b>GT47B4</b> | GRMZM2G149932 | 0.69 | <a href="#">At1g34270</a>                             | 1,284 |
| EDA5a         | GRMZM2G054703 | 0.71 | <a href="#">At3g03650</a> , <a href="#">At3g45400</a> | 1,112 |
| EDA5b         | GRMZM2G127416 | 0.87 | <a href="#">At3g03650</a> , <a href="#">At3g45400</a> | 1,548 |
| <b>ARAD1</b>  | GRMZM2G060579 | 1.14 | <a href="#">At2q35100</a> , <a href="#">At5q44930</a> | 2,926 |
| <b>GT47B2</b> | GRMZM2G158496 | 1.40 | <a href="#">At1g67410</a>                             | 2,883 |
| GT47B1        | GRMZM2G139355 |      | <a href="#">At1g74680</a>                             | 3     |

##### Group C

|        |               |  |                           |    |
|--------|---------------|--|---------------------------|----|
| GT47C1 | GRMZM2G149189 |  | <a href="#">At5g20260</a> | 50 |
|--------|---------------|--|---------------------------|----|

|                 |               |      |                              |        |
|-----------------|---------------|------|------------------------------|--------|
| GT47C3          | GRMZM2G325561 |      | At5g25310                    | 14     |
| GT47C2          | GRMZM2G001938 |      | None                         | 9      |
| <b>Group D</b>  |               |      |                              |        |
| <b>GT47D3</b>   | GRMZM2G018962 | 0.12 | <b>At4g38040</b>             | 933    |
| <b>GT47D4</b>   | GRMZM2G000976 | 0.26 | <b>At4g38040</b>             | 966    |
| <b>GT47D2</b>   | GRMZM2G322047 | 0.55 | <b>At5g19670</b>             | 758    |
| <b>GT47D5</b>   | GRMZM2G076688 | 0.70 | <b>At1g21480</b>             | 2,075  |
| GT47D1          | GRMZM2G048010 |      | At4g16745                    | 8      |
| <b>Group E</b>  |               |      |                              |        |
| IRX10-1f        | GRMZM2G056702 | 0.35 | None                         | 6,133  |
| IRX10-1g        | GRMZM2G023020 | 0.45 | None                         | 2,977  |
| IRX10-1i        | GRMZM2G134308 | 0.60 | None                         | 990    |
| IRX10-1h        | GRMZM2G448834 | 0.65 | None                         | 1,542  |
| FRA8a           | GRMZM2G113245 | 1.06 | At2g28110, At5g22940         | 597    |
| <b>IRX10-1c</b> | GRMZM2G000581 | 2.73 | <b>At1g27440</b> , At5g61840 | 5,615  |
| IRX10-1e        | GRMZM2G059845 | 3.07 | None                         | 7,430  |
| <b>IRX10-1a</b> | GRMZM2G059825 | 3.95 | <b>At1g27440</b> , At5g61840 | 32,830 |
| <b>IRX10-1d</b> | GRMZM5G898668 | 4.90 | <b>At1g27440</b> , At5g61840 | 10,535 |
| FRA8b           | GRMZM2G035377 |      | At2g28110, At5g22940         | 153    |
| IRX10-1b        | GRMZM2G152029 |      | At1g27440, At5g61840         | 53     |

### Glycosyl Transferase Family 61 (GT61)

|                |               |      |                                        |        |
|----------------|---------------|------|----------------------------------------|--------|
| <b>MUC121d</b> | GRMZM2G139574 | 0.14 | <b>At2g03370, At2g03360</b>            | 1,724  |
| <b>MUC121e</b> | GRMZM5G869788 | 0.26 | <b>At2g03370, At2g03360</b>            | 785    |
| XYLTa          | GRMZM2G096946 | 0.28 | None                                   | 4,530  |
| GT61-8         | GRMZM2G176576 | 0.41 | None                                   | 6,246  |
| GT61-13        | GRMZM2G024444 | 0.54 | None                                   | 627    |
| <b>GT61-6</b>  | GRMZM2G130800 | 0.72 | <b>At3g18180, At3g18170</b>            | 3,333  |
| <b>XYLTb</b>   | GRMZM2G419267 | 0.93 | <b>At5g55500</b>                       | 2,405  |
| GT61-18        | GRMZM2G476699 | 1.09 | None                                   | 1,365  |
| GT61-11        | GRMZM2G062552 | 1.57 | None                                   | 2,479  |
| <b>GT61-5</b>  | GRMZM5G875864 | 1.63 | <b>At3g18180, At3g18170</b>            | 2,469  |
| <b>MUC121a</b> | GRMZM2G131055 | 2.15 | <b>At3g10320, At3g57380, At2g41640</b> | 3,120  |
| GT61-9         | GRMZM2G098793 | 3.33 | None                                   | 12,034 |
| GT61-20        | GRMZM2G074896 | 3.39 | None                                   | 3,761  |
| <b>MUC121c</b> | GRMZM2G459363 | 4.42 | <b>At3g10320, At3g57380, At2g41640</b> | 1,280  |
| GT61-19        | GRMZM2G354610 | 8.34 | None                                   | 1,716  |
| GT61-15        | GRMZM2G090584 | 9.00 | None                                   | 5,180  |
| GT61-14        | GRMZM2G412986 |      | None                                   | 397    |
| GT61-12        | GRMZM2G094579 |      | None                                   | 295    |
| XYLTc          | GRMZM2G410916 |      | None                                   | 253    |
| GT61-3         | GRMZM2G022442 |      | At3g18180, At3g18170                   | 239    |
| GT61-7         | GRMZM2G447347 |      | None                                   | 236    |
| XYLTd          | GRMZM2G397391 |      | None                                   | 96     |
| GT61-16        | GRMZM2G336865 |      | None                                   | 51     |
| GT61-1         | GRMZM2G105221 |      | At2g03370, At2g03360                   | 43     |
| GT61-4         | GRMZM2G700386 |      | At3g18180, At3g18170                   | 40     |
| GT61-10        | GRMZM2G099082 |      | None                                   | 32     |
| XYLTg          | GRMZM2G008316 |      | None                                   | 29     |
| MUC121b        | GRMZM2G136580 |      | At3g10320, At3g57380, At2g41640        | 22     |
| XYLTb          | GRMZM2G104829 |      | None                                   | 3      |
| XYLTf          | GRMZM2G464895 |      | None                                   | 3      |
| XYLTe          | GRMZM2G065939 |      | None                                   | 2      |
| GT61-17        | GRMZM2G336929 |      | None                                   | 1      |
| GT61-2         | GRMZM2G451975 |      | At2g03370, At2g03360                   | 0      |

### Glycosyl Transferase Family 77 (GT77)

|               |               |      |                                                    |       |
|---------------|---------------|------|----------------------------------------------------|-------|
| <b>RRA1a</b>  | GRMZM2G053946 | 0.20 | At1g75120, <b>At1g75110, At1g19360</b>             | 3,170 |
| GT77-18       | GRMZM2G421126 | 0.45 | None                                               | 726   |
| <b>RGXT3</b>  | GRMZM2G085042 | 0.50 | At4g01770, <b>At4g01750, At4g01220</b> , At1g56550 | 1,479 |
| GT77-2        | GRMZM2G014187 | 0.76 | At2g02061, At1g14590                               | 968   |
| <b>XEG113</b> | GRMZM2G011912 | 1.74 | <b>At2g35610</b>                                   | 2,908 |
| RRA1b         | GRMZM2G028905 | 2.06 | At1g75120, <b>At1g75110, At1g19360</b>             | 2,174 |
| RRA1c         | GRMZM2G172726 |      | At1g75120, <b>At1g75110, At1g19360</b>             | 335   |
| GT77-8        | GRMZM2G104231 |      | None                                               | 293   |
| GT77-9        | GRMZM2G421579 |      | None                                               | 236   |
| GT77-11       | GRMZM2G313481 |      | None                                               | 176   |
| GT77-3        | GRMZM2G008064 |      | At2g02061, At1g14590                               | 144   |
| GT77-10       | GRMZM2G146158 |      | None                                               | 135   |
| GT77-1        | GRMZM2G378073 |      | At2g02061, At1g14590                               | 75    |
| GT77-12       | GRMZM2G129114 |      | None                                               | 73    |

|         |               |  |                                                                                   |    |
|---------|---------------|--|-----------------------------------------------------------------------------------|----|
| GT77-13 | GRMZM2G180324 |  | None                                                                              | 68 |
| GT77-4  | GRMZM2G011383 |  | <a href="#">At1g28710</a> , <a href="#">At1g28700</a> , <a href="#">At1g28695</a> | 23 |
| GT77-16 | GRMZM2G180330 |  | None                                                                              | 13 |
| GT77-7  | GRMZM2G144034 |  | None                                                                              | 13 |
| GT77-17 | GRMZM2G001497 |  | None                                                                              | 8  |
| GT77-15 | GRMZM2G481052 |  | None                                                                              | 2  |
| GT77-5  | GRMZM2G150215 |  | None                                                                              | 2  |
| GT77-6  | GRMZM2G077106 |  | None                                                                              | 1  |
| GT77-14 | GRMZM2G304956 |  | None                                                                              | 1  |

### Glycosyl Transferase Family 106 (GT106)

#### Group A

|         |               |      |                                                       |       |
|---------|---------------|------|-------------------------------------------------------|-------|
| RRT-L1a | GRMZM2G087513 | 0.55 | <a href="#">At5g64600</a>                             | 796   |
| RRT1a   | GRMZM2G104511 | 1.33 | <a href="#">At5g15740</a> , <a href="#">At3g02250</a> | 6,284 |
| RRT1b   | GRMZM2G089854 | 3.59 | <a href="#">At5g15740</a> , <a href="#">At3g02250</a> | 1,103 |
| RRT-L2  | GRMZM6G438921 |      | <a href="#">At1g22460</a>                             | 0     |

#### Group B

|              |               |      |                           |       |
|--------------|---------------|------|---------------------------|-------|
| <b>MSR1a</b> | GRMZM2G080565 | 0.50 | <a href="#">At1g52630</a> | 1,163 |
| MSR3a        | GRMZM2G025671 | 0.54 | <a href="#">At3g03810</a> | 2,421 |
| MSR4b        | GRMZM2G050649 | 0.60 | <a href="#">At1g04910</a> | 3,775 |
| MSR4a        | GRMZM2G320802 | 0.66 | <a href="#">At1g04910</a> | 3,676 |
| MSR3b        | GRMZM2G025867 | 0.84 | <a href="#">At3g03810</a> | 4,357 |
| MSR3c        | GRMZM2G014793 | 0.88 | <a href="#">At3g03810</a> | 4,731 |

#### Group C

|                |               |      |                                                       |       |
|----------------|---------------|------|-------------------------------------------------------|-------|
| <b>PAGR1b</b>  | GRMZM2G134156 | 0.36 | <a href="#">At3g26370</a>                             | 824   |
| <b>PAGR-L3</b> | GRMZM2G054028 | 0.44 | <a href="#">At1g11990</a> , <a href="#">At1g62330</a> | 580   |
| <b>PAGR1a</b>  | GRMZM2G139657 | 0.76 | <a href="#">At3g26370</a>                             | 1,698 |
| PAGR-L1        | GRMZM2G057037 | 1.64 | <a href="#">At4g24530</a> , <a href="#">At5g65470</a> | 3,494 |
| PAGR-L5        | GRMZM2G124872 |      | <a href="#">At1g29200</a>                             | 355   |
| PAGR-L9a       | GRMZM2G419739 |      | <a href="#">At2g01480</a> , <a href="#">At1g14970</a> | 157   |
| PAGR1c         | GRMZM5G817948 |      | <a href="#">At3g26370</a>                             | 98    |
| PAGR-L8        | ACF80826      |      | <a href="#">At1g35510</a>                             | 0     |
| PAGR-L9b       | ACR35648      |      | <a href="#">At2g01480</a> , <a href="#">At1g14970</a> | 0     |

#### Group D

|                  |               |      |                                                       |       |
|------------------|---------------|------|-------------------------------------------------------|-------|
| <b>GT106-L1b</b> | GRMZM2G131699 | 0.50 | <a href="#">At1g76270</a> , <a href="#">At1g20550</a> | 2,318 |
| GT106-L4         | GRMZM2G101181 | 0.54 | <a href="#">At4g16650</a>                             | 1,161 |
| GT106-L1a        | GRMZM2G142664 | 1.26 | <a href="#">At1g76270</a> , <a href="#">At1g20550</a> | 1,238 |

### TBL genes

#### Group A

|      |                  |  |                           |    |
|------|------------------|--|---------------------------|----|
| TBL6 | AC233955.1_FG009 |  | <a href="#">At3g62390</a> | 83 |
| TBL5 | GRMZM2G414826    |  | <a href="#">At5g20590</a> | 12 |

#### Group B

|        |               |      |                                                       |       |
|--------|---------------|------|-------------------------------------------------------|-------|
| TBL10b | GRMZM2G004445 | 0.17 | <a href="#">At3g06080</a> , <a href="#">At5g19160</a> | 660   |
| TBL7   | GRMZM2G129065 | 0.43 | <a href="#">At1g48880</a>                             | 1,107 |
| TBLa   | GRMZM2G083555 | 0.92 | <a href="#">At3g06080</a> , <a href="#">At5g19160</a> | 901   |
| TBL10a | GRMZM2G025250 |      | <a href="#">At3g06080</a> , <a href="#">At5g19160</a> | 434   |
| TBL9   | GRMZM2G321394 |      | <a href="#">At5g06230</a> , <a href="#">At3g11570</a> | 4     |

#### Group C

|        |               |      |                                                       |       |
|--------|---------------|------|-------------------------------------------------------|-------|
| TBL16a | GRMZM2G094500 | 0.16 | <a href="#">At5g20680</a>                             | 614   |
| TBL13b | GRMZM2G010714 | 0.19 | <a href="#">At2g14530</a>                             | 661   |
| TBL14  | GRMZM2G043240 | 1.17 | <a href="#">At5g64020</a> , <a href="#">At2g37720</a> | 4,115 |
| TBL12a | GRMZM2G117804 |      | <a href="#">At5g64470</a>                             | 444   |
| TBL13a | GRMZM2G395061 |      | <a href="#">At2g14530</a>                             | 141   |
| TBL12b | GRMZM2G098438 |      | <a href="#">At5g64470</a>                             | 99    |
| TBL16b | GRMZM2G318337 |      | <a href="#">At5g20680</a>                             | 0     |
| TBL16c | GRMZM2G094482 |      | <a href="#">At5g20680</a>                             | 0     |

#### Group D

|        |                  |      |                                                                                                               |       |
|--------|------------------|------|---------------------------------------------------------------------------------------------------------------|-------|
| TBL20c | GRMZM2G004183    | 0.41 | <a href="#">At3g02440</a> , <a href="#">At5g15890</a> , <a href="#">At5g15900</a>                             | 6,379 |
| TBL25b | GRMZM2G061283    | 0.62 | <a href="#">At1g01430</a> , <a href="#">At4g01080</a> , <a href="#">At4g11090</a> , <a href="#">At4g23790</a> | 1,446 |
| TBL25a | GRMZM2G131152    | 0.67 | <a href="#">At1g01430</a> , <a href="#">At4g01080</a> , <a href="#">At4g11090</a> , <a href="#">At4g23790</a> | 2,074 |
| TLS7   | GRMZM2G096169    | 0.69 | <a href="#">At5g51640</a> , <a href="#">At4g25360</a>                                                         | 2,312 |
| AXY4a  | GRMZM2G122073    | 4.25 | <a href="#">At1g70230</a>                                                                                     | 2,459 |
| AXY4c  | GRMZM2G039525    |      | <a href="#">At1g70230</a>                                                                                     | 234   |
| AXY4b  | GRMZM2G340933    |      | <a href="#">At1g70230</a>                                                                                     | 138   |
| TBL20b | GRMZM2G305439    |      | <a href="#">At3g02440</a> , <a href="#">At5g15890</a> , <a href="#">At5g15900</a>                             | 132   |
| TBL20d | AC216886.3_FG002 |      | <a href="#">At3g02440</a> , <a href="#">At5g15890</a> , <a href="#">At5g15900</a>                             | 108   |
| TBLc   | GRMZM2G047941    |      | None                                                                                                          | 90    |
| TBLb   | GRMZM2G138771    |      | None                                                                                                          | 54    |
| AXY4L  | GRMZM2G107373    |      | <a href="#">At3g28150</a>                                                                                     | 32    |
| TBL20a | GRMZM2G164715    |      | <a href="#">At3g02440</a> , <a href="#">At5g15890</a> , <a href="#">At5g15900</a>                             | 30    |



|                                              |                  |       |                      |        |
|----------------------------------------------|------------------|-------|----------------------|--------|
| TBLd                                         | GRMZM2G005454    |       | None                 | 0      |
| TBLe                                         | AC216886.3_FG001 |       | None                 | 0      |
| <b>Group E</b>                               |                  |       |                      |        |
| TBLf                                         | GRMZM2G117742    | 0.26  | None                 | 2,571  |
| TBLs                                         | GRMZM2G038855    | 0.31  | None                 | 693    |
| TBL1a                                        | GRMZM2G033805    | 0.32  | At3g12060, At5g06700 | 5,973  |
| TBLt                                         | GRMZM5G898867    | 0.44  | None                 | 2,459  |
| TBLj                                         | GRMZM2G047298    | 0.64  | None                 | 3,368  |
| TBL28b                                       | AC208201.3_FG003 | 0.65  | At2g40150, At3g55990 | 767    |
| TBL3                                         | GRMZM2G078469    | 0.69  | At5g01360            | 551    |
| TBL28a                                       | GRMZM2G134341    | 0.73  | At2g40150, At3g55990 | 3,191  |
| TBLh                                         | GRMZM2G400938    | 0.84  | None                 | 544    |
| TBL1b                                        | GRMZM2G165961    | 1.18  | At3g12060, At5g06700 | 741    |
| TBLu                                         | GRMZM2G012021    | 1.22  | None                 | 3,280  |
| TBL32b                                       | GRMZM5G826911    | 1.26  | At3g11030, At2g40320 | 7,314  |
| TBLp                                         | GRMZM2G411159    | 1.35  | None                 | 1,464  |
| TBLq                                         | GRMZM2G451325    | 1.62  | None                 | 1,430  |
| TBLk                                         | GRMZM2G147266    | 1.65  | None                 | 8,145  |
| TBL32a                                       | GRMZM2G139250    | 3.83  | At3g11030, At2g40320 | 51,656 |
| TBLr                                         | GRMZM2G066165    |       | None                 | 456    |
| TBL1c                                        | GRMZM5G843892    |       | At3g12060, At5g06700 | 424    |
| TBLn                                         | GRMZM2G040833    |       | None                 | 267    |
| TBL34                                        | GRMZM2G406974    |       | At2g38320            | 242    |
| TBLm                                         | GRMZM2G090728    |       | None                 | 167    |
| TBLo                                         | GRMZM2G043095    |       | None                 | 128    |
| TBL2                                         | GRMZM2G077437    |       | At1g60790            | 40     |
| TBLi                                         | GRMZM2G404081    |       | None                 | 38     |
| TBLg                                         | GRMZM2G409309    |       | None                 | 24     |
| TBL45                                        | GRMZM2G059565    |       | At2g30010            | 0      |
| <b>AXY Genes</b>                             |                  |       |                      |        |
| AXY9b                                        | GRMZM2G095698    | 1.63  | At3g03210            | 2,076  |
| <b>AXY9a</b>                                 | GRMZM2G131221    | 3.29  | At3g03210            | 2,884  |
| <b>RWA Genes</b>                             |                  |       |                      |        |
| RWA-L6                                       | GRMZM2G413162    | 0.80  | None                 | 9,377  |
| RWA2                                         | GRMZM2G020721    | 1.74  | At3g06550            | 15,562 |
| RWA-L5                                       | GRMZM2G458538    | 2.24  | None                 | 22,888 |
| RWA-L1                                       | GRMZM2G076394    |       | None                 | 402    |
| RWA-L2                                       | GRMZM2G147351    |       | None                 | 129    |
| RWA-L4                                       | GRMZM2G463445    |       | None                 | 79     |
| RWA-L3                                       | GRMZM2G370741    |       | None                 | 38     |
| <b>BAHD Genes</b>                            |                  |       |                      |        |
| BAHD5a                                       | GRMZM2G050270    | 0.67  | None                 | 4,148  |
| BAHD5b                                       | GRMZM2G094428    | 1.37  | None                 | 6,047  |
| BAHD3                                        | GRMZM2G050072    | 1.49  | None                 | 2,631  |
| BAHD4a                                       | GRMZM2G060210    | 1.72  | None                 | 1,413  |
| BAHD4b                                       | GRMZM2G108714    | 1.77  | None                 | 3,316  |
| BAHD8                                        | GRMZM2G159641    | 5.55  | None                 | 3,918  |
| BAHD2a                                       | GRMZM2G375159    | 6.12  | None                 | 13,193 |
| BAHD9 (ZmPMT)                                | GRMZM2G028104    | 13.42 | None                 | 35,743 |
| BAHD7                                        | GRMZM2G130728    |       | None                 | 437    |
| BAHD10                                       | GRMZM2G107027    |       | None                 | 422    |
| BAHD2b                                       | GRMZM2G305900    |       | None                 | 168    |
| BAHD1                                        | GRMZM2G314898    |       | None                 | 53     |
| <b>ER/Golgi-resident proteins</b>            |                  |       |                      |        |
| <b>Glycosyl Transferase Family 10 (GT10)</b> |                  |       |                      |        |
| <b>FUT13</b>                                 | GRMZM2G068710    | 0.60  | At1g71990            | 4,289  |
| FUT1b                                        | GRMZM2G386463    | 0.75  | None                 | 1,699  |
| FUT1a                                        | GRMZM2G103939    | 0.81  | None                 | 3,611  |
| <b>Glycosyl Transferase Family 13 (GT13)</b> |                  |       |                      |        |
| <b>CGL1</b>                                  | GRMZM2G426275    | 0.80  | At4g38240            | 2,851  |
| <b>Glycosyl Transferase Family 14 (GT14)</b> |                  |       |                      |        |
| <b>UNE7</b>                                  | GRMZM2G038898    | 0.30  | At3g03690            | 1,324  |
| <b>GT14-3</b>                                | GRMZM2G060061    | 0.48  | At1g71070            | 1,770  |
| <b>GT14-1</b>                                | GRMZM2G018869    | 0.65  | At1g71070            | 1,753  |
| <b>GLCAT14Ab</b>                             | GRMZM2G423476    | 0.78  | At5g39990, At5g15050 | 1,145  |

|                                                  |                  |      |                                 |        |
|--------------------------------------------------|------------------|------|---------------------------------|--------|
| GT14-5                                           | GRMZM2G178571    | 1.07 | At3g24040                       | 6,053  |
| GLCAT14Ad                                        | GRMZM2G043310    | 1.69 | None                            | 6,993  |
| GLCAT14Ac                                        | GRMZM2G150323    | 1.83 | None                            | 7,574  |
| GT14-2                                           | GRMZM2G055313    |      | At4g27480, At3g15350, At1g53100 | 470    |
| GLCAT14Aa                                        | GRMZM2G063133    |      | At5q39990, At5q15050            | 49     |
| GT14-4                                           | GRMZM2G111428    |      | None                            | 3      |
| <b>Glycosyl Transferase Family 16 (GT16)</b>     |                  |      |                                 |        |
| <b>GT16</b>                                      | GRMZM2G084515    | 0.45 | At2g05320                       | 604    |
| <b>Glycosyl Transferase Family 17 (GT17)</b>     |                  |      |                                 |        |
| GT17-2                                           | GRMZM2G062488    | 0.72 | None                            | 1,429  |
| GT17-4                                           | GRMZM2G104118    | 0.97 | None                            | 6,335  |
| GT17-3                                           | GRMZM2G079682    | 1.64 | None                            | 3,307  |
| GT17-1                                           | GRMZM2G045435    |      | At2g13290                       | 337    |
| <b>Glycosyl Transferase Family 21 (GT21)</b>     |                  |      |                                 |        |
| <b>GCS</b>                                       | GRMZM2G061419    | 0.34 | At2g19880                       | 4,471  |
| <b>Glycosyl Transferase Family 22 (GT22)</b>     |                  |      |                                 |        |
| APTG1d                                           | GRMZM2G164175    | 0.38 | None                            | 1,025  |
| <b>EBS3</b>                                      | GRMZM2G051262    | 0.43 | At1g16900                       | 4,222  |
| APTG1a                                           | GRMZM2G000937    | 0.46 | None                            | 932    |
| ALG12                                            | GRMZM2G152194    | 0.58 | At1g02145                       | 2,100  |
| APTG1b                                           | GRMZM2G108921    |      | None                            |        |
| APTG1c                                           | GRMZM2G103473    |      | None                            |        |
| <b>Glycosyl Transferase Family 24 (GT24)</b>     |                  |      |                                 |        |
| EBS1b                                            | GRMZM5G846198    | 0.95 | None                            | 4,272  |
| EBS1a                                            | GRMZM2G370162    | 1.97 | At1g71220                       | 3,308  |
| <b>Glycosyl Transferase Family 50 (GT50)</b>     |                  |      |                                 |        |
| PEANUT1                                          | GRMZM2G048762    | 0.44 | At5g22130                       | 1,959  |
| <b>Glycosyl Transferase Family 57 (GT57)</b>     |                  |      |                                 |        |
| <b>ALG6</b>                                      | GRMZM2G023884    | 0.62 | At5g38460                       | 1,659  |
| ALG8                                             | GRMZM2G411569    |      | At2g44660                       | 135    |
| <b>Glycosyl Transferase Family 58 (GT58)</b>     |                  |      |                                 |        |
| <b>ALG3</b>                                      | GRMZM2G066362    | 0.93 | At2g47760                       | 2,941  |
| <b>Glycosyl Transferase Family 59 (GT59)</b>     |                  |      |                                 |        |
| <b>ALG10</b>                                     | GRMZM2G056036    | 0.68 | At5g02410                       | 1,758  |
| <b>Glycosyl Transferase Family 64 (GT64)</b>     |                  |      |                                 |        |
| <b>GT64-1</b>                                    | GRMZM2G121237    | 0.26 | At1g80290, At3g55830            | 1,812  |
| <b>GT64-2</b>                                    | GRMZM5G889321    | 0.73 | At1g80290, At3g55830            | 1,898  |
| GT64-3                                           | GRMZM2G133633    |      | At5g04500                       | 23     |
| <b>Glycosyl Transferase Family 66 (GT66)</b>     |                  |      |                                 |        |
| <b>STT3Aa</b>                                    | GRMZM2G154165    | 0.23 | At5g19690                       | 1,592  |
| GT66-2                                           | GRMZM2G044096    | 0.47 | None                            | 6,813  |
| <b>STT3Ab</b>                                    | GRMZM2G060611    | 0.72 | At5g19690                       | 10,056 |
| GT66-1                                           | GRMZM2G040876    | 0.78 | None                            | 4,012  |
| STT3B                                            | GRMZM2G351599    |      | At1g34130                       | 30     |
| <b>Alpha-Expansins (<math>\alpha</math>-Exp)</b> |                  |      |                                 |        |
| <b><math>\alpha</math>-Exp15a</b>                | GRMZM2G105844    | 0.10 | At2q03090, At1q69530, At1q26770 | 2,323  |
| <b><math>\alpha</math>-Exp6a</b>                 | GRMZM2G445169    | 0.32 | At3g55500, At2g39700, At2g28950 | 716    |
| <b><math>\alpha</math>-Exp6b</b>                 | GRMZM2G368886    | 0.50 | At3q55500, At2q39700, At2q28950 | 3,613  |
| <b><math>\alpha</math>-Exp13a</b>                | GRMZM2G120724    | 0.67 | At3g03220                       | 1,764  |
| <b><math>\alpha</math>-Exp13b</b>                | GRMZM2G072121    | 0.88 | At3g03220                       | 1,485  |
| <b><math>\alpha</math>-Exp8b</b>                 | GRMZM2G339122    | 0.92 | At5g05290, At2g40610            | 3,068  |
| $\alpha$ -Exp19                                  | GRMZM5G832248    | 1.12 | At3g29365                       | 3,818  |
| <b><math>\alpha</math>-Exp8a</b>                 | GRMZM2G361064    | 1.36 | At5g05290, At2g40610            | 5,909  |
| $\alpha$ -Exp11a                                 | GRMZM2G074585    |      | At1g20190                       | 163    |
| $\alpha$ -Exp12a                                 | GRMZM2G106899    |      | At3g15370                       | 64     |
| $\alpha$ -Exp12b                                 | GRMZM2G139695    |      | At3g15370                       | 62     |
| $\alpha$ -Exp20                                  | AC219190.3_FG002 |      | At4g38210                       | 18     |
| $\alpha$ -Exp17b                                 | AC234190.1_FG001 |      | At4g01630                       | 11     |
| $\alpha$ -Exp11b                                 | GRMZM2G073373    |      | At1g20190                       | 10     |

|                                                                                      |                  |        |                                                                                                               |        |
|--------------------------------------------------------------------------------------|------------------|--------|---------------------------------------------------------------------------------------------------------------|--------|
| $\alpha$ -Exp21                                                                      | GRMZM2G126196    |        | <a href="#">At5g39260</a>                                                                                     | 9      |
| $\alpha$ -Exp17a                                                                     | GRMZM2G094523    |        | <a href="#">At4g01630</a>                                                                                     | 9      |
| $\alpha$ -Exp11h                                                                     | GRMZM2G414779    |        | None                                                                                                          | 8      |
| $\alpha$ -Exp15b                                                                     | GRMZM2G149605    |        | <a href="#">At2g03090</a> , <a href="#">At1g69530</a> , <a href="#">At1g26770</a>                             | 8      |
| $\alpha$ -Exp18a                                                                     | GRMZM2G127029    |        | <a href="#">At1g62980</a> , <a href="#">At1a12560</a>                                                         | 7      |
| $\alpha$ -Exp12c                                                                     | GRMZM2G030531    |        | <a href="#">At3g15370</a>                                                                                     | 7      |
| $\alpha$ -Exp11o                                                                     | GRMZM2G160314    |        | None                                                                                                          | 6      |
| $\alpha$ -Exp11f                                                                     | GRMZM2G469689    |        | None                                                                                                          | 5      |
| $\alpha$ -Exp11e                                                                     | GRMZM2G469701    |        | None                                                                                                          | 5      |
| $\alpha$ -Exp18b                                                                     | GRMZM2G066862    |        | <a href="#">At1g62980</a> , <a href="#">At1g12560</a>                                                         | 4      |
| $\alpha$ -Exp11g                                                                     | GRMZM2G173826    |        | None                                                                                                          | 3      |
| $\alpha$ -Exp11n                                                                     | GRMZM2G019398    |        | None                                                                                                          | 3      |
| $\alpha$ -Exp11k                                                                     | GRMZM2G374248    |        | None                                                                                                          | 2      |
| $\alpha$ -Exp11l                                                                     | GRMZM2G035189    |        | None                                                                                                          | 2      |
| $\alpha$ -Exp11c                                                                     | GRMZM2G146540    |        | None                                                                                                          | 0      |
| $\alpha$ -Exp11d                                                                     | GRMZM2G088791    |        | None                                                                                                          | 0      |
| $\alpha$ -Exp11i                                                                     | GRMZM2G332412    |        | None                                                                                                          | 0      |
| $\alpha$ -Exp11j                                                                     | GRMZM2G115909    |        | None                                                                                                          | 0      |
| $\alpha$ -Exp11m                                                                     | GRMZM2G064174    |        | None                                                                                                          | 0      |
| $\alpha$ -Exp11p                                                                     | GRMZM2G450546    |        | None                                                                                                          | 0      |
| $\alpha$ -Exp11q                                                                     | GRMZM2G303937    |        | None                                                                                                          | 0      |
| <b><math>\alpha</math>-Expansin-like Family (<math>\alpha</math>-ExpL)</b>           |                  |        |                                                                                                               |        |
| <b><math>\alpha</math>-ExpL2a</b>                                                    | GRMZM2G114322    | 0.52   | <a href="#">At4g38400</a> , <a href="#">At3g45970</a> , <a href="#">At3g45960</a>                             | 683    |
| <b><math>\alpha</math>-ExpL2b</b>                                                    | GRMZM2G026147    | 1.91   | <a href="#">At4g38400</a> , <a href="#">At3g45970</a> , <a href="#">At3g45960</a>                             | 1,386  |
| $\alpha$ -ExpL2c                                                                     | GRMZM2G095968    | 8.02   | <a href="#">At4g38400</a> , <a href="#">At3g45970</a> , <a href="#">At3g45960</a>                             | 1,951  |
| $\alpha$ -ExpL2d                                                                     | GRMZM2G127072    |        | <a href="#">At4g38400</a> , <a href="#">At3g45970</a> , <a href="#">At3g45960</a>                             | 446    |
| <b><math>\beta</math>-Expansin-like Family (<math>\beta</math>-Exp)</b>              |                  |        |                                                                                                               |        |
| $\beta$ -Exp2k                                                                       | GRMZM2G474194    | 0.06   | None                                                                                                          | 517    |
| <b><math>\beta</math>-Exp3a</b>                                                      | GRMZM2G169967    | 0.15   | <a href="#">At4g28250</a> , <a href="#">At2g20750</a>                                                         | 786    |
| $\beta$ -Exp2m                                                                       | GRMZM2G021427    | 0.80   | None                                                                                                          | 669    |
| $\beta$ -Exp2i                                                                       | GRMZM2G056236    | 0.82   | None                                                                                                          | 1,620  |
| $\beta$ -Exp2h                                                                       | GRMZM2G154178    | 0.97   | None                                                                                                          | 3,692  |
| $\beta$ -Exp2n                                                                       | GRMZM2G082520    |        | None                                                                                                          | 481    |
| $\beta$ -Exp3b                                                                       | GRMZM2G078279    |        | <a href="#">At4g28250</a> , <a href="#">At2g20750</a>                                                         | 350    |
| $\beta$ -Exp2l                                                                       | GRMZM2G104013    |        | None                                                                                                          | 322    |
| $\beta$ -Exp2c                                                                       | GRMZM2G103672    |        | None                                                                                                          | 294    |
| $\beta$ -Exp2o                                                                       | GRMZM2G342246    |        | None                                                                                                          | 272    |
| $\beta$ -Exp2j                                                                       | GRMZM2G327266    |        | None                                                                                                          | 80     |
| $\beta$ -Exp2e                                                                       | GRMZM2G148485    |        | None                                                                                                          | 52     |
| $\beta$ -Exp2d                                                                       | GRMZM2G026956    |        | None                                                                                                          | 21     |
| $\beta$ -Exp2a                                                                       | GRMZM2G100931    |        | None                                                                                                          | 12     |
| $\beta$ -Exp2f                                                                       | GRMZM2G121308    |        | None                                                                                                          | 4      |
| $\beta$ -Exp2b                                                                       | GRMZM2G401983    |        | None                                                                                                          | 3      |
| $\beta$ -Exp2q                                                                       | GRMZM2G118873    |        | None                                                                                                          | 0      |
| <b>Xyloglucan endo-<math>\beta</math>-D-transglucosylase/hydrolase Family (GH16)</b> |                  |        |                                                                                                               |        |
| <b>Group A</b>                                                                       |                  |        |                                                                                                               |        |
| <b>XTH8</b>                                                                          | GRMZM2G174855    | 0.35   | <a href="#">At1g11545</a>                                                                                     | 2,357  |
| <b>XTH5</b>                                                                          | GRMZM2G004699    | 0.69   | <a href="#">At5g13870</a> , <a href="#">At2g06850</a>                                                         | 1,054  |
| XTH9                                                                                 | GRMZM2G180870    |        | <a href="#">At4g03210</a>                                                                                     | 75     |
| XTH11b                                                                               | GRMZM2G110299    |        | <a href="#">At3q48580</a> , <a href="#">At3q25050</a> , <a href="#">At4q13090</a> , <a href="#">At4q13080</a> | 15     |
| XTH11a                                                                               | GRMZM5G845080    |        | <a href="#">At3q48580</a> , <a href="#">At3q25050</a> , <a href="#">At4q13090</a> , <a href="#">At4q13080</a> | 0      |
| <b>Group B</b>                                                                       |                  |        |                                                                                                               |        |
| <b>XTH15c</b>                                                                        | GRMZM2G166944    | 0.38   | <a href="#">At3g23730</a> , <a href="#">At4g14130</a>                                                         | 26,637 |
| XTHB8                                                                                | GRMZM2G128876    | 0.55   | None                                                                                                          | 1,207  |
| XTHB11                                                                               | GRMZM2G063566    | 0.73   | None                                                                                                          | 1,595  |
| XTHB10                                                                               | GRMZM2G119783    | 1.86   | None                                                                                                          | 23,810 |
| XTHB4                                                                                | GRMZM2G392125    | 3.45   | None                                                                                                          | 9,278  |
| XTH15d                                                                               | GRMZM2G026980    | 101.18 | <a href="#">At3g23730</a> , <a href="#">At4g14130</a>                                                         | 3,452  |
| XTHB3                                                                                | GRMZM2G142857    |        | None                                                                                                          | 430    |
| XTHB9                                                                                | GRMZM2G364748    |        | None                                                                                                          | 105    |
| XTHB2                                                                                | GRMZM2G104651    |        | None                                                                                                          | 84     |
| XTHB1                                                                                | GRMZM2G076157    |        | None                                                                                                          | 45     |
| XTHB5                                                                                | GRMZM2G062811    |        | None                                                                                                          | 14     |
| XTHB6                                                                                | GRMZM2G091303    |        | None                                                                                                          | 11     |
| XTH26a                                                                               | GRMZM2G143473    |        | <a href="#">At4g28850</a>                                                                                     | 7      |
| XTHB7                                                                                | GRMZM2G091118    |        | None                                                                                                          | 0      |
| XTH15a                                                                               | AC210669.3_FG001 |        | <a href="#">At3g23730</a> , <a href="#">At4g14130</a>                                                         | 0      |
| XTH15b                                                                               | GRMZM2G413006    |        | <a href="#">At3g23730</a> , <a href="#">At4g14130</a>                                                         | 0      |
| XTH26b                                                                               | GRMZM2G112619    |        | <a href="#">At4g28850</a>                                                                                     | 0      |
| <b>Group C</b>                                                                       |                  |        |                                                                                                               |        |

|               |               |       |                             |       |
|---------------|---------------|-------|-----------------------------|-------|
| <b>XTH28a</b> | GRMZM2G039919 | 0.02  | <b>At2g01850, At1g14720</b> | 1,900 |
| <b>XTH31d</b> | GRMZM2G113761 | 0.15  | <b>At2g36870, At3g44990</b> | 2,368 |
| XTH30c        | GRMZM2G060837 | 0.18  | <b>At1g32170, At4g18990</b> | 900   |
| <b>XTH31a</b> | GRMZM2G118579 | 0.30  | <b>At2g36870, At3g44990</b> | 1,303 |
| <b>XTH28b</b> | GRMZM2G319798 | 0.35  | <b>At2g01850, At1g14720</b> | 1,919 |
| <b>XTH31b</b> | GRMZM2G413044 | 0.49  | <b>At2g36870, At3g44990</b> | 917   |
| <b>XTH30b</b> | GRMZM2G070271 | 11.05 | <b>At1g32170, At4g18990</b> | 1,890 |
| XTH31c        | GRMZM2G388684 |       | <b>At2g36870, At3g44990</b> | 359   |
| XTH30a        | GRMZM5G808290 |       | <b>At1g32170, At4g18990</b> | 12    |

#### Yieldin Family

|          |                  |       |                  |       |
|----------|------------------|-------|------------------|-------|
| Yieldin2 | GRMZM2G090441    | 0.02  | None             | 907   |
| CHIAh    | GRMZM2G453805    | 43.63 | <b>At5g24090</b> | 7,649 |
| CHIAg    | AC193632.2_FG002 |       | <b>At5g24090</b> | 256   |
| Yieldin1 | GRMZM2G141456    |       | None             | 253   |
| CHIAa    | GRMZM2G430936    |       | <b>At5g24090</b> | 61    |
| CHIAe    | GRMZM2G130686    |       | None             | 23    |
| CHIAc    | GRMZM2G023650    |       | <b>At5g24090</b> | 8     |
| CHIAf    | GRMZM2G160265    |       | None             | 3     |
| CHIAb    | GRMZM2G430942    |       | <b>At5g24090</b> | 0     |
| CHIAd    | GRMZM2G080547    |       | None             | 0     |

#### Glycosyl Hydrolase Family 9 (GH9)

|              |                  |      |                                                   |        |
|--------------|------------------|------|---------------------------------------------------|--------|
| <b>CEL1a</b> | GRMZM2G076049    | 0.09 | <b>At1g70710, At1g23210</b>                       | 2,249  |
| <b>CEL1b</b> | GRMZM2G455642    | 0.19 | <b>At1g70710, At1g23210</b>                       | 888    |
| GH9B8c       | GRMZM2G154678    | 0.40 | <b>At2g32990</b>                                  | 636    |
| <b>KOR1b</b> | GRMZM2G003379    | 0.95 | <b>At5g49720, At4g24260</b>                       | 1,657  |
| <b>KOR2a</b> | GRMZM2G178025    | 1.08 | <b>At1g65610</b>                                  | 1,744  |
| <b>KOR1a</b> | GRMZM2G099101    | 1.09 | <b>At5g49720, At4g24260</b>                       | 1,658  |
| <b>KOR1c</b> | GRMZM2G147849    | 1.19 | <b>At5g49720, At4g24260</b>                       | 35,560 |
| GH9B7a       | GRMZM2G147422    | 1.43 | <b>At1a75680, At1a19940</b>                       | 21,952 |
| KOR1d        | GRMZM2G110735    | 1.50 | <b>At5g49720, At4g24260</b>                       | 67,286 |
| GH9B8b       | GRMZM2G482256    | 5.43 | <b>At2g32990</b>                                  | 5,528  |
| GH9B8a       | GRMZM2G151257    | 7.15 | <b>At2g32990</b>                                  | 1,494  |
| GH9C2b       | GRMZM2G143747    |      | <b>At4g11050, At1g64390</b>                       | 256    |
| CEL5         | GRMZM2G125436    |      | <b>At1g71380, At1g22880</b>                       | 135    |
| GH9B15       | GRMZM2G167669    |      | <b>At4g23560, At4g09740</b>                       | 71     |
| GH9L2        | GRMZM2G009025    |      | None                                              | 56     |
| CEL2         | GRMZM2G331566    |      | <b>At4g02290, At1g02800</b>                       | 52     |
| KOR2b        | GRMZM2G066162    |      | <b>At1g65610</b>                                  | 47     |
| GH9B7b       | GRMZM2G153987    |      | <b>At1a75680, At1a19940</b>                       | 39     |
| GH9C1        | GRMZM2G343144    |      | <b>At1g48930</b>                                  | 33     |
| GH9C2a       | GRMZM2G453565    |      | <b>At4g11050, At1g64390</b>                       | 5      |
| GH9B12       | AC203408.4_FG003 |      | <b>At2g44570, At2g44560, At2g44550, At2g44540</b> |        |
| GH9L1        | GRMZM2G141911    |      | None                                              |        |

#### Glycosyl Hydrolase Family 17 (GH17)

##### Group A

|         |               |        |      |       |
|---------|---------------|--------|------|-------|
| GH17A9  | GRMZM2G019185 | 1.06   | None | 575   |
| GH17A11 | GRMZM2G137535 | 4.88   | None | 1,389 |
| GH17A7  | GRMZM2G125032 | 163.81 | None | 3,348 |
| GH17A3  | GRMZM2G123107 |        | None | 457   |
| GH17A1  | GRMZM2G380561 |        | None | 442   |
| GH17A5  | GRMZM2G062600 |        | None | 347   |
| GH17A6  | GRMZM2G061403 |        | None | 292   |
| GH17A4  | GRMZM2G065585 |        | None | 262   |
| GH17A2  | GRMZM2G088951 |        | None | 184   |
| GH17A12 | GRMZM2G014723 |        | None | 155   |
| GH17A8  | GRMZM2G433365 |        | None | 108   |
| GH17A10 | GRMZM2G041961 |        | None | 28    |

##### Group B

|                |                  |       |                                                   |       |
|----------------|------------------|-------|---------------------------------------------------|-------|
| <b>GH17B5</b>  | GRMZM2G152638    | 0.30  | <b>At4g17180</b>                                  | 515   |
| GH17B1         | AC233893.1_FG006 | 0.41  | None                                              | 4,589 |
| <b>GH17B6</b>  | GRMZM2G097207    | 0.49  | <b>At5g58090, At4g31140</b>                       | 1,227 |
| GH17B14        | AC159612.1_FG007 | 0.56  | <b>At5g18220, At3g04010, At2g19440, At1g64760</b> | 1,017 |
| <b>GH17B13</b> | GRMZM2G078566    | 34.75 | <b>At5g18220, At3g04010, At2g19440, At1g64760</b> | 1,208 |
| GH17B4         | GRMZM2G083222    |       | <b>At5g58480</b>                                  | 353   |
| GH17B8         | GRMZM5G834199    |       | <b>At5g58090, At4g31140</b>                       | 278   |
| GH17B7         | GRMZM2G090469    |       | <b>At5g58090, At4g31140</b>                       | 269   |
| GH17B10        | GRMZM2G310739    |       | <b>At5g64790</b>                                  | 116   |
| GH17B2         | AC232238.2_FG004 |       | None                                              | 110   |

|                |                  |      |                                            |        |
|----------------|------------------|------|--------------------------------------------|--------|
| GH17B11        | GRMZM2G083599    |      | At5g18220, At3g04010, At2g19440, At1g64760 | 69     |
| GH17B9         | GRMZM2G005798    |      | At5g64790                                  | 62     |
| GH17B12        | GRMZM2G020898    |      | At5g18220, At3g04010, At2g19440, At1g64760 | 24     |
| GH17B3         | AC217887.3_FG001 |      | None                                       | 0      |
| <b>Group C</b> |                  |      |                                            |        |
| GH17C10        | GRMZM2G172537    | 0.04 | At2g27500, At5g42100, At1g32860            | 1,039  |
| GH17C11        | GRMZM2G030850    | 0.18 | At2g27500, At5g42100, At1g32860            | 1,715  |
| GH17C6         | GRMZM2G046101    | 0.37 | At5g42720, At4g34480, At2g16230            | 2,343  |
| GH17C5         | GRMZM5G858249    | 0.55 | None                                       | 4,346  |
| GH17C15        | GRMZM2G148400    | 0.78 | At4g18340, At1g30080                       | 1,282  |
| GH17C13        | GRMZM2G076584    | 0.91 | At2g27500                                  | 3,353  |
| GH17C14        | GRMZM2G177510    | 1.21 | At2g27500                                  | 5,407  |
| GH17C2         | GRMZM2G111143    | 2.18 | At3g46570, At3g55430, At2g39640            | 5,874  |
| GH17C12        | GRMZM2G127117    | 2.77 | At2g27500                                  | 2,248  |
| GH17C1         | GRMZM2G064202    |      | At3g46570, At3g55430, At2g39640            | 466    |
| GH17C4         | GRMZM2G096591    |      | At5g42720, At4g34480, At2g16230            | 298    |
| GH17C8         | GRMZM2G117872    |      | At3g15800, At2g26600                       | 269    |
| GH17C9         | GRMZM2G008627    |      | At3g15800, At2g26600                       | 266    |
| GH17C3         | GRMZM2G012758    |      | At5g42720, At4g34480, At2g16230            | 164    |
| GH17C7         | GRMZM2G335111    |      | None                                       | 0      |
| <b>Group D</b> |                  |      |                                            |        |
| GH17D6         | GRMZM2G005082    | 0.09 | At5g56590, At4g29360                       | 6,864  |
| GH17D1         | GRMZM2G046459    | 0.19 | At5g55180, At4g26830                       | 24,412 |
| GH17D7         | GRMZM2G072526    | 0.23 | At3g13560                                  | 2,013  |
| GH17D2         | GRMZM2G114140    | 0.23 | At5g55180, At4g26830                       | 2,303  |
| GH17D8         | GRMZM2G113420    | 0.32 | At3g13560                                  | 2,250  |
| GH17D10        | GRMZM2G325008    | 0.37 | At2g01630, At1g66250                       | 3,864  |
| GH17D9         | GRMZM2G111324    | 0.58 | At2g01630, At1g66250                       | 1,259  |
| GH17D3         | GRMZM2G454550    |      | At5g55180, At4g26830                       | 43     |
| GH17D5         | GRMZM2G431039    |      | At5g55180, At4g26830                       | 36     |
| GH17D4         | GRMZM5G846916    |      | At5g55180, At4g26830                       | 26     |
| <b>Group E</b> |                  |      |                                            |        |
| GH17E3         | GRMZM2G458164    | 0.08 | At4g14080, At3g23770, At3g07320            | 1,424  |
| GH17E2         | GRMZM2G179354    |      | At4g14080, At3g23770, At3g07320            | 34     |
| GH17E1         | GRMZM2G000959    |      | At4g14080, At3g23770, At3g07320            | 9      |

## Polygalacturonanases (GH28)

|                |               |      |                                            |       |
|----------------|---------------|------|--------------------------------------------|-------|
| <b>Group A</b> |               |      |                                            |       |
| PGaseA3        | GRMZM2G052844 | 0.35 | At5g41870, At4g23820                       | 3,286 |
| PGaseA6        | GRMZM2G13982  | 0.37 | At3g16850, At5g49215, At3g06770            | 2,080 |
| PGaseA5        | GRMZM5G882418 | 0.38 | At3g62110                                  | 7,771 |
| PGaseA7        | GRMZM2G113815 | 0.43 | At3g16850, At5g49215, At3g06770            | 4,064 |
| PGaseA4        | GRMZM2G057296 | 0.57 | At3g62110                                  | 1,195 |
| PGaseA12       | GRMZM2G135763 | 1.76 | At3g42950, At1g19170                       | 4,396 |
| PGaseA11       | GRMZM2G047414 | 1.84 | At3g42950, At1g19170                       | 4,668 |
| PGaseA2        | GRMZM2G174598 |      | At5g41870, At4g23820                       | 302   |
| PGaseA1        | GRMZM2G004435 |      | At4g33440                                  | 267   |
| PGaseA9        | GRMZM2G119494 |      | At4g23500, At3g61490, At3g48950, At2g23900 | 51    |
| PGaseA8        | GRMZM2G107073 |      | At4g23500, At3g61490, At3g48950, At2g23900 | 10    |
| PGaseA10       | GRMZM2G179444 |      | At4g23500, At3g61490, At3g48950, At2g23900 | 3     |
| <b>Group C</b> |               |      |                                            |       |
| PGaseC2        | GRMZM2G037431 | 0.06 | At1g60590, At1g10640                       | 1,347 |
| PGaseC6        | GRMZM2G467435 | 0.17 | At1g48100                                  | 1,641 |
| PGaseC4        | GRMZM2G170388 | 1.06 | At1g56710, At4g01890, At1g02460            | 1,103 |
| PGaseC3        | GRMZM2G002034 |      | At1g60590, At1g10640                       | 448   |
| PGaseC5        | GRMZM2G026804 |      | At1g56710, At4g01890, At1g02460            | 242   |
| PX1            | GRMZM2G338158 |      | At3g26610                                  | 161   |
| PGaseC1        | GRMZM2G435380 |      | At5g14650                                  | 94    |
| PGaseC7        | GRMZM2G098912 |      | At1g48100                                  | 46    |
| <b>Group D</b> |               |      |                                            |       |
| PGaseD2        | GRMZM5G831200 | 0.38 | At1g70500, At1g23460                       | 518   |
| PGaseD3        | GRMZM2G079263 |      | At1g70500, At1g23460                       | 344   |
| PGaseD4        | GRMZM2G079617 |      | At1g70500, At1g23460                       | 147   |
| PGaseD1        | GRMZM2G034835 |      | At1g80170                                  | 132   |
| QRT2c          | GRMZM2G111609 |      | At3g07970, At3g57510, At2g41850            | 119   |
| QRT2b          | GRMZM2G092746 |      | At3g07970, At3g57510, At2g41850            | 112   |
| QRT2a          | GRMZM2G004500 |      | At3g07970, At3g57510, At2g41850            | 6     |
| <b>Group E</b> |               |      |                                            |       |
| PGaseE3        | GRMZM2G153666 |      | At4g18180                                  | 34    |
| PGaseE2        | GRMZM2G399421 |      | At4g18180                                  | 8     |
| PGaseE1        | GRMZM2G452150 |      | At4g18180                                  | 6     |



**Group F**

|          |               |  |      |     |
|----------|---------------|--|------|-----|
| PGaseF15 | GRMZM2G112579 |  | None | 362 |
| PGaseF11 | GRMZM2G320175 |  | None | 10  |
| PGaseF3  | GRMZM2G151755 |  | None | 9   |
| PGaseF16 | GRMZM2G027782 |  | None | 7   |
| PGaseF13 | GRMZM2G094811 |  | None | 5   |
| PGaseF14 | GRMZM2G058033 |  | None | 2   |
| PGaseF2  | GRMZM2G374375 |  | None | 0   |
| PGaseF4  | GRMZM2G386171 |  | None | 0   |
| PGaseF5  | GRMZM2G160526 |  | None | 0   |
| PGaseF6  | GRMZM2G160626 |  | None | 0   |
| PGaseF12 | GRMZM2G394259 |  | None | 0   |
| PGaseF1  | GRMZM2G030265 |  | None | 0   |
| PGaseF7  | GRMZM2G162384 |  | None | 0   |
| PGaseF8  | GRMZM2G454497 |  | None | 0   |
| PGaseF9  | GRMZM2G454608 |  | None | 0   |
| PGaseF10 | GRMZM2G418644 |  | None | 0   |

**Group G**

|         |               |      |                           |       |
|---------|---------------|------|---------------------------|-------|
| PGaseG1 | GRMZM2G026855 | 2.17 | <a href="#">At1g65570</a> | 6,338 |
|---------|---------------|------|---------------------------|-------|

**Glycosyl Hydrolase Family 35 (GH35)**

|                         |               |      |                                                                                   |       |
|-------------------------|---------------|------|-----------------------------------------------------------------------------------|-------|
| <a href="#">BGAL8</a>   | GRMZM2G127123 | 0.11 | <a href="#">At2g28470</a>                                                         | 4,952 |
| <a href="#">BGAL1a</a>  | GRMZM2G130375 | 0.18 | <a href="#">At3g13750</a>                                                         | 3,937 |
| <a href="#">BGAL5a</a>  | GRMZM2G417455 | 0.21 | <a href="#">At1g45130</a> , <a href="#">At4g36360</a>                             | 6,812 |
| <a href="#">BGAL14a</a> | GRMZM2G386824 | 0.23 | <a href="#">At4g38590</a> , <a href="#">At4g35010</a> , <a href="#">At2g16730</a> | 1,187 |
| <a href="#">BGAL5b</a>  | GRMZM2G178106 | 0.32 | <a href="#">At1g45130</a> , <a href="#">At4g36360</a>                             | 2,646 |
| <a href="#">BGAL1c</a>  | GRMZM2G081583 | 0.38 | <a href="#">At3g13750</a>                                                         | 1,719 |
| <a href="#">BGAL1d</a>  | GRMZM2G027385 | 0.38 | <a href="#">At3g13750</a>                                                         | 1,716 |
| <a href="#">BGAL10</a>  | GRMZM2G038281 | 0.54 | <a href="#">At5g63810</a>                                                         | 9,443 |
| <a href="#">BGAL9</a>   | GRMZM2G073584 | 0.88 | <a href="#">At2g32810</a>                                                         | 5,894 |
| BGAL17a                 | GRMZM2G164676 | 0.97 | <a href="#">At1g72990</a>                                                         | 2,140 |
| BGAL17d                 | GRMZM2G162238 |      | <a href="#">At5g20710</a> , <a href="#">At2g04060</a> , <a href="#">At1q31740</a> | 167   |
| BGAL17c                 | GRMZM2G114756 |      | <a href="#">At5g20710</a> , <a href="#">At2g04060</a> , <a href="#">At1q31740</a> | 115   |
| BGAL1b                  | GRMZM2G121495 |      | <a href="#">At3g13750</a>                                                         | 105   |
| BGAL14c                 | GRMZM2G071883 |      | <a href="#">At4g38590</a> , <a href="#">At4g35010</a> , <a href="#">At2g16730</a> | 48    |
| BGAL14b                 | GRMZM2G175779 |      | <a href="#">At4g38590</a> , <a href="#">At4g35010</a> , <a href="#">At2g16730</a> | 31    |
| BGAL17b                 | GRMZM5G828603 |      | <a href="#">At1g72990</a>                                                         | 0     |

**Pectin/Pectate Lyase Family (PL)**

|                       |                  |      |                                                                                                               |       |
|-----------------------|------------------|------|---------------------------------------------------------------------------------------------------------------|-------|
| <a href="#">PL5</a>   | GRMZM2G412207    | 0.40 | <a href="#">At4g13210</a> , <a href="#">At3g24670</a> , <a href="#">At5g48900</a> , <a href="#">At3g07010</a> | 2,437 |
| <a href="#">PL6</a>   | GRMZM2G131912    | 0.44 | <a href="#">At4g13210</a> , <a href="#">At3g24670</a> , <a href="#">At5g48900</a> , <a href="#">At3g07010</a> | 3,266 |
| <a href="#">AT59a</a> | GRMZM2G080056    | 0.52 | <a href="#">At5g15110</a> , <a href="#">At3q01270</a> , <a href="#">At2g02720</a> , <a href="#">At1q14420</a> | 584   |
| PL4                   | GRMZM2G005562    | 2.10 | <a href="#">At3g55140</a>                                                                                     | 8,496 |
| PDE329                | GRMZM2G051403    | 2.53 | <a href="#">At3g55250</a>                                                                                     | 1,213 |
| PL1                   | GRMZM2G472060    |      | <a href="#">At3g53190</a>                                                                                     | 461   |
| AT59e                 | GRMZM2G364349    |      | <a href="#">At5g15110</a> , <a href="#">At3q01270</a> , <a href="#">At2g02720</a> , <a href="#">At1q14420</a> | 24    |
| AT59d                 | GRMZM2G323418    |      | <a href="#">At5g15110</a> , <a href="#">At3q01270</a> , <a href="#">At2g02720</a> , <a href="#">At1q14420</a> | 19    |
| AT59c                 | AC194852.3_FG007 |      | <a href="#">At5g15110</a> , <a href="#">At3q01270</a> , <a href="#">At2g02720</a> , <a href="#">At1q14420</a> | 17    |
| PL3                   | GRMZM2G126077    |      | <a href="#">At3g09540</a>                                                                                     | 7     |
| PL2                   | GRMZM2G139396    |      | <a href="#">At5g09280</a>                                                                                     | 3     |
| AT59b                 | GRMZM2G129635    |      | <a href="#">At5g15110</a> , <a href="#">At3q01270</a> , <a href="#">At2g02720</a> , <a href="#">At1q14420</a> | 0     |

**Rhamnogalacturonan-I lyase Family (RGIL)**

|                          |               |      |                                                                                   |       |
|--------------------------|---------------|------|-----------------------------------------------------------------------------------|-------|
| <a href="#">RGlyase1</a> | GRMZM2G154124 | 0.36 | <a href="#">At1g09890</a>                                                         | 2,215 |
| RGlyase2                 | GRMZM2G015792 |      | <a href="#">At4g38030</a> , <a href="#">At2g22620</a> , <a href="#">At4g37950</a> | 133   |
| RGlyase3                 | GRMZM2G175698 |      | <a href="#">At4g38030</a> , <a href="#">At2g22620</a> , <a href="#">At4g37950</a> | 34    |
| RGlyase4                 | GRMZM2G450771 |      | <a href="#">At4g38030</a> , <a href="#">At2g22620</a> , <a href="#">At4g37950</a> | 10    |

**Pectin Methylsterase (PME)****Group A**

|                        |               |      |                                                       |       |
|------------------------|---------------|------|-------------------------------------------------------|-------|
| <a href="#">PME5</a>   | GRMZM2G162333 | 0.04 | <a href="#">At5g47500</a>                             | 2,261 |
| <a href="#">PMEL8</a>  | GRMZM2G167637 | 0.17 | <a href="#">At5g64640</a> , <a href="#">At5g09760</a> | 1,475 |
| <a href="#">PME31b</a> | GRMZM2G178916 | 1.60 | <a href="#">At3g29090</a>                             | 1,380 |
| PMEL9                  | GRMZM2G004927 |      | <a href="#">At3g17060</a>                             | 487   |
| PME31a                 | GRMZM2G019411 |      | <a href="#">At3g29090</a>                             | 417   |
| PMEL13                 | GRMZM2G043943 |      | <a href="#">At5g19730</a>                             | 402   |
| PMEL15                 | GRMZM2G177940 |      | <a href="#">At5g19730</a>                             | 364   |
| QRT1                   | GRMZM2G037411 |      | <a href="#">At5g55590</a>                             | 181   |
| PMEL17                 | GRMZM2G455564 |      | <a href="#">At1g05310</a>                             | 107   |
| PMEL14                 | GRMZM2G120779 |      | <a href="#">At5g19730</a>                             | 61    |
| PMEL11                 | GRMZM2G431856 |      | <a href="#">At5g07430</a> , <a href="#">At5g07420</a> | 48    |

|                                                 |                  |      |                                 |        |
|-------------------------------------------------|------------------|------|---------------------------------|--------|
| PMEL10                                          | GRMZM2G121278    |      | At2g47280, At2g19150            | 48     |
| PMEL12                                          | GRMZM2G382557    |      | At5g07430, At5g07420            | 3      |
| PMEL16                                          | GRMZM2G318299    |      | At2g36710, At2g36700            | 0      |
| <b>Group B</b>                                  |                  |      |                                 |        |
| VGDH2b                                          | GRMZM2G352359    |      | At3g62170, At2g47040, At2g47030 | 36     |
| VGDH2d                                          | GRMZM2G012328    |      | At3g62170, At2g47040, At2g47030 | 31     |
| VGDH2c                                          | GRMZM2G125356    |      | At3g62170, At2g47040, At2g47030 | 18     |
| PMEL7                                           | GRMZM2G314663    |      | At4g33230, At2g26450            | 17     |
| PMEL5                                           | GRMZM2G137676    |      | At4g33230, At2g26450            | 10     |
| PMEL4                                           | GRMZM2G060400    |      | At4g33230, At2g26450            | 8      |
| PMEL3                                           | GRMZM2G043415    |      | At4g33230, At2g26450            | 7      |
| PME58b                                          | GRMZM2G112984    |      | At3g05610, At5g27870            | 5      |
| PMEL6                                           | GRMZM2G062996    |      | At4g33230, At2g26450            | 4      |
| VGDH2a                                          | GRMZM2G128549    |      | At3g62170, At2g47040, At2g47030 | 3      |
| PME58a                                          | GRMZM2G321870    |      | At3g05610, At5g27870            | 0      |
| <b>Group D</b>                                  |                  |      |                                 |        |
| <b>PME12</b>                                    | GRMZM2G046618    | 0.10 | At2g26440                       | 516    |
| <b>PMEL1</b>                                    | GRMZM2G008593    | 0.32 | At5g53370, At3g49220            | 1,109  |
| <b>PME2b</b>                                    | GRMZM2G025182    | 0.72 | At3g14310, At1g53830            | 2,473  |
| <b>PME2a</b>                                    | GRMZM2G136106    | 0.88 | At3g14310, At1g53830            | 2,409  |
| PME44                                           | GRMZM2G175499    | 2.21 | At4g33220, At3g43270            | 1,454  |
| PMEL2                                           | GRMZM2G017555    |      | At3g05620                       | 412    |
| PME35                                           | GRMZM2G158240    |      | At3g59010, At2g43050            | 183    |
| PME41b                                          | GRMZM2G119864    |      | At2g47550, At4g02330, At1g02810 | 35     |
| PME41a                                          | GRMZM2G128682    |      | At2g47550, At4g02330, At1g02810 | 3      |
| <b>Pectin Acetyltransferase Family</b>          |                  |      |                                 |        |
| <b>PAE7</b>                                     | GRMZM2G156365    | 0.20 | At5g45280, At4g19410            | 5,680  |
| PAEL5                                           | GRMZM2G336879    | 0.38 | None                            | 608    |
| <b>PAEL1</b>                                    | GRMZM2G141873    | 0.47 | At3g09410                       | 1,397  |
| PAEL8                                           | GRMZM2G160569    | 0.51 | None                            | 5,751  |
| PAEL3                                           | GRMZM2G329002    | 6.66 | None                            | 1,580  |
| PAEL2                                           | GRMZM2G016561    |      | At3g09410                       | 386    |
| PAE8                                            | AC204604.3_FG008 |      | At4g19420                       | 284    |
| PAEL7                                           | GRMZM2G164134    |      | None                            | 277    |
| PAE9                                            | GRMZM2G117999    |      | At5g23870                       | 272    |
| PAEL6                                           | GRMZM2G066500    |      | None                            | 131    |
| PAEL4                                           | GRMZM2G418635    |      | None                            | 1      |
| <b>Arabinogalactan-Protein/Fasciclin Family</b> |                  |      |                                 |        |
| <b>FLA10a</b>                                   | GRMZM2G003752    | 0.15 | At3g60900, At2g45470            | 1,338  |
| AGPa                                            | AC209784.3_FG007 | 0.16 | None                            | 11,880 |
| FLA4b                                           | GRMZM2G035933    | 0.20 | At3g46550                       | 647    |
| FLA2a                                           | GRMZM2G003165    | 3.87 | At5g55730, At4g12730            | 1,472  |
| <b>FLA11</b>                                    | GRMZM2G177242    | 6.62 | At5g03170, At5g60490            | 91,930 |
| AGP24                                           | AC213621.5_FG002 |      | At5g40730                       | 335    |
| FLA2c                                           | GRMZM2G148534    |      | At5g55730, At4g12730            | 193    |
| FLA2b                                           | GRMZM2G144610    |      | At5g55730, At4g12730            | 30     |
| FLA10b                                          | GRMZM2G065718    |      | At3g60900, At2g45470            | 2      |
| FLA4a                                           | GRMZM2G421415    |      | At3g46550                       | 0      |
| <b>Prolyl-4-hydroxylases</b>                    |                  |      |                                 |        |
| <b>P4Hh</b>                                     | GRMZM2G168506    | 0.28 | At3g28480                       | 2,158  |
| <b>P4Hd</b>                                     | GRMZM2G348578    | 0.40 | At4g33910                       | 934    |
| <b>P4H-2</b>                                    | GRMZM2G459063    | 0.48 | At5g18900, At3g06300            | 2,307  |
| <b>P4Hg</b>                                     | GRMZM2G520535    | 0.67 | At3g28480                       | 2,032  |
| <b>P4Ha</b>                                     | GRMZM2G145061    | 0.74 | At1g20270                       | 1,640  |
| <b>P4Hb</b>                                     | GRMZM2G025867    | 0.84 | At1g20270                       | 4,357  |
| <b>P4H-1</b>                                    | GRMZM2G028004    | 0.89 | At2g43080                       | 1,554  |
| <b>P4Hc</b>                                     | GRMZM5G855891    | 1.07 | At1g20270                       | 1,235  |
| P4He                                            | GRMZM5G843555    |      | None                            | 357    |
| P4Hf                                            | GRMZM2G054224    |      | None                            | 87     |
| <b>Receptor-like Kinase Family</b>              |                  |      |                                 |        |
| CRK4c                                           | GRMZM2G168588    | 0.02 | None                            | 2,237  |
| CRK4i                                           | GRMZM2G058394    | 0.05 | None                            | 789    |
| CRK4j                                           | GRMZM2G476523    | 0.13 | None                            | 5,284  |
| CRK4s                                           | GRMZM2G148536    | 0.18 | None                            | 1,790  |
| CRK4r                                           | GRMZM2G151589    | 0.18 | None                            | 1,608  |
| CRK4f                                           | GRMZM2G154301    | 0.23 | None                            | 808    |
| CRK4e                                           | GRMZM2G048194    | 0.36 | None                            | 3,317  |

|        |                  |       |                           |       |
|--------|------------------|-------|---------------------------|-------|
| CRK4h  | GRMZM2G064605    | 0.40  | None                      | 2,692 |
| CRK4v  | GRMZM2G049057    | 0.51  | None                      | 682   |
| CRK4d  | GRMZM2G421463    | 0.54  | None                      | 762   |
| CRK4u  | GRMZM2G138896    | 0.63  | None                      | 632   |
| CRK4z  | GRMZM2G477139    | 0.83  | None                      | 3,710 |
| CRK4q  | GRMZM2G149798    | 1.08  | None                      | 747   |
| CRK4p  | GRMZM2G346861    | 1.57  | None                      | 902   |
| CRK4x  | GRMZM2G159110    | 2.36  | None                      | 5,292 |
| CRK4b  | GRMZM2G410991    | 3.26  | None                      | 3,041 |
| CRK4ac | GRMZM2G036826    | 21.38 | None                      | 4,764 |
| CRK4a  | AC205471.4_FG003 |       | None                      | 357   |
| CRK4y  | GRMZM2G149809    |       | None                      | 302   |
| CRK4n  | GRMZM2G038846    |       | None                      | 295   |
| CRK4k  | GRMZM2G125918    |       | None                      | 238   |
| CRK4t  | GRMZM2G154449    |       | None                      | 163   |
| CLVc   | GRMZM2G166413    |       | <a href="#">At1g65380</a> | 94    |
| CRK4l  | GRMZM2G340534    |       | None                      | 73    |
| CRK4o  | GRMZM2G393507    |       | None                      | 18    |
| CRK4w  | GRMZM2G023655    |       | None                      | 16    |
| CLVb   | AC204763.2_FG001 |       | <a href="#">At1g65380</a> | 15    |
| CLVa   | GRMZM2G011401    |       | <a href="#">At1g65380</a> | 10    |
| CRK4aa | GRMZM2G038490    |       | None                      | 8     |
| CRK4ab | GRMZM2G086410    |       | None                      | 7     |
| CRK4g  | GRMZM2G004617    |       | None                      | 0     |
| CRK4m  | GRMZM2G100747    |       | None                      | 0     |

### Proteases

#### Aspartyl Group

|                           |                  |       |                           |       |
|---------------------------|------------------|-------|---------------------------|-------|
| Aspartyl5                 | GRMZM2G335978    | 0.67  | <a href="#">At5g10080</a> | 1,722 |
| <a href="#">Aspartyl4</a> | GRMZM2G177575    | 0.68  | <a href="#">At4g35880</a> | 2,389 |
| Aspartyl3                 | GRMZM2G420910    | 1.24  | <a href="#">At4g35880</a> | 695   |
| Aspartyl7                 | GRMZM2G133029    | 3.01  | <a href="#">At1g08210</a> | 9,115 |
| Aspartyl6                 | GRMZM2G411333    | 5.23  | <a href="#">At1g05840</a> | 1,331 |
| Aspartyl2                 | GRMZM2G168115    | 14.87 | <a href="#">At4g35880</a> | 3,153 |
| Aspartyl1                 | AC190609.3_FG001 |       | None                      | 32    |

#### Cysteine Group

|                       |               |      |                           |        |
|-----------------------|---------------|------|---------------------------|--------|
| <a href="#">MPL1a</a> | GRMZM2G047533 | 0.29 | <a href="#">At5g14180</a> | 1,128  |
| <a href="#">Cys1</a>  | GRMZM2G098298 | 1.58 | <a href="#">At3g43960</a> | 25,126 |
| <a href="#">MPL1e</a> | GRMZM2G027825 | 2.99 | <a href="#">At3g52370</a> | 18,210 |
| <a href="#">MPL1d</a> | GRMZM2G329181 | 3.54 | <a href="#">At3g52370</a> | 19,058 |
| MPL1b                 | GRMZM2G057136 |      | <a href="#">At5g14180</a> | 150    |
| MPL1c                 | GRMZM2G322892 |      | <a href="#">At5g14180</a> | 122    |

#### Metallo Group

|                     |               |      |                                                                                   |       |
|---------------------|---------------|------|-----------------------------------------------------------------------------------|-------|
| <a href="#">MPb</a> | GRMZM2G110220 | 1.13 | <a href="#">At1g59970</a> , <a href="#">At1g70170</a> , <a href="#">At1g24140</a> | 1,716 |
| MPa                 | GRMZM2G317386 |      | <a href="#">At4g16640</a> , <a href="#">At2g45040</a>                             | 0     |

#### Other Proteins

|      |                  |      |      |       |
|------|------------------|------|------|-------|
| OP32 | GRMZM2G340065    | 0.13 | None | 758   |
| OP33 | GRMZM2G010435    | 0.21 | None | 1,512 |
| OP27 | GRMZM2G066326    | 0.22 | None | 7,782 |
| OP26 | GRMZM2G367701    | 0.65 | None | 3,263 |
| OP36 | AC155377.1_FG001 | 1.19 | None | 8,935 |
| OP30 | GRMZM2G073465    | 1.53 | None | 5,186 |
| OP28 | GRMZM2G006377    | 1.57 | None | 4,629 |
| OP29 | GRMZM2G166281    | 1.90 | None | 661   |
| OP25 | GRMZM2G180926    |      | None | 358   |
| OP22 | GRMZM2G456217    |      | None | 232   |
| OP31 | GRMZM2G070571    |      | None | 223   |
| OP5  | GRMZM2G045706    |      | None | 184   |
| OP34 | GRMZM2G150256    |      | None | 180   |
| OP1  | GRMZM2G014526    |      | None | 85    |
| OP2  | GRMZM2G097286    |      | None | 53    |
| OP21 | GRMZM2G099765    |      | None | 28    |
| OP6  | GRMZM2G130053    |      | None | 24    |
| OP3  | GRMZM2G060090    |      | None | 20    |
| OP19 | GRMZM2G077479    |      | None | 19    |
| OP16 | GRMZM2G070011    |      | None | 16    |
| OP13 | GRMZM2G137690    |      | None | 15    |
| OP7  | GRMZM2G363926    |      | None | 14    |
| OP14 | GRMZM2G334321    |      | None | 13    |
| OP4  | GRMZM2G160447    |      | None | 11    |
| OP8  | GRMZM2G397965    |      | None | 8     |

|      |                  |  |      |   |
|------|------------------|--|------|---|
| OP15 | GRMZM2G019742    |  | None | 8 |
| OP24 | GRMZM2G035045    |  | None | 8 |
| OP35 | GRMZM2G150276    |  | None | 4 |
| OP9  | GRMZM2G028862    |  | None | 2 |
| OP12 | AC225716.2_FG003 |  | None | 2 |
| OP20 | GRMZM2G020657    |  | None | 1 |
| OP10 | GRMZM2G095628    |  | None | 0 |
| OP11 | GRMZM2G165086    |  | None | 0 |
| OP17 | GRMZM2G098102    |  | None | 0 |
| OP18 | GRMZM2G166870    |  | None | 0 |
| OP23 | AC209810.3_FG002 |  | None | 0 |

#### GPI-anchored proteins

##### Cobra-like proteins

|        |               |      |                                 |        |
|--------|---------------|------|---------------------------------|--------|
| COBL4a | GRMZM2G167497 | 0.40 | At5g15630                       | 1,485  |
| COBL9b | GRMZM2G377215 | 0.56 | At5g49270, At4g16120, At3g16860 | 7,886  |
| COBRAb | GRMZM5G826714 | 1.14 | None                            | 61,004 |
| COBL4b | GRMZM2G109326 | 4.47 | At5g15630                       | 11,909 |
| COBL1  | GRMZM2G167520 |      | At3g29810, At3g02210            | 131    |
| COBL6  | GRMZM2G465188 |      | At1g09790                       | 25     |
| COBL10 | GRMZM2G056627 |      | At4g27110, At3g20580            | 10     |
| COBRAa | GRMZM2G071970 |      | None                            | 1      |
| COBL9a | GRMZM2G353276 |      | At5g49270, At4g16120, At3g16860 | 0      |

##### SKU-like proteins

|       |                  |      |      |       |
|-------|------------------|------|------|-------|
| SKU2  | GRMZM2G402584    | 0.03 | None | 1,326 |
| SKU3  | GRMZM2G049693    | 0.06 | None | 2,765 |
| SKU10 | GRMZM2G076225    | 0.09 | None | 931   |
| SKU4  | GRMZM2G172642    | 0.23 | None | 1,237 |
| SKU7  | GRMZM2G043301    | 0.29 | None | 1,108 |
| SKU9  | GRMZM2G076985    | 0.73 | None | 4,959 |
| SKU1  | GRMZM2G438386    | 0.91 | None | 1,792 |
| SKU5  | GRMZM2G077317    |      | None | 345   |
| SKU6  | AC177897.2_FG002 |      | None | 251   |
| SKU12 | GRMZM2G142584    |      | None | 123   |
| SKU13 | GRMZM2G129064    |      | None | 14    |
| SKU8  | GRMZM2G360529    |      | None | 10    |
| SKU11 | GRMZM2G157929    |      | None | 6     |

#### Monolignol synthesis

##### Phenylalanine Ammonia Lyase (PAL)

|       |               |      |      |         |
|-------|---------------|------|------|---------|
| PAL6  | GRMZM2G118345 | 0.57 | None | 743     |
| PAL4  | GRMZM2G081582 | 2.53 | None | 5,605   |
| PAL3  | GRMZM2G441347 | 3.95 | None | 1,840   |
| PAL5  | GRMZM2G029048 | 4.10 | None | 33,864  |
| PAL1  | GRMZM2G160541 | 5.06 | None | 27,762  |
| PAL8  | GRMZM2G334660 | 5.28 | None | 2,172   |
| PAL10 | GRMZM2G063917 | 5.57 | None | 1,138   |
| PAL2  | GRMZM2G074604 | 6.34 | None | 137,599 |
| PAL9  | GRMZM2G170692 | 7.62 | None | 8,478   |
| PAL7  | GRMZM2G153871 |      | None | 71      |

##### 4-Coumarate CoA Ligase (4-CL)

|        |               |       |                                 |        |
|--------|---------------|-------|---------------------------------|--------|
| 4CLL8a | GRMZM5G805585 | 0.20  | At5g63380                       | 968    |
| 4CLL4  | GRMZM2G096020 | 1.41  | At1g20480                       | 3,246  |
| 4CLL7  | GRMZM2G122787 | 1.87  | At4g05160                       | 1,828  |
| 4CLL8c | GRMZM2G091643 | 3.12  | At5g63380                       | 959    |
| 4CL4   | GRMZM2G055320 | 3.58  | At1g51680, At3g21240, At3g21230 | 10,101 |
| 4CLL6  | GRMZM2G433624 | 13.55 | At4g19010                       | 2,023  |
| 4CL3   | GRMZM2G054013 |       | At1g65060                       | 482    |
| 4CLL8b | GRMZM2G019746 |       | None                            | 248    |
| 4CLL5a | GRMZM2G014651 |       | At1g62940                       | 8      |
| 4CLL5b | GRMZM2G145179 |       | At1g62940                       | 8      |

##### Cinnamyl-CoA Reductase (CCR)

|        |               |      |                                 |        |
|--------|---------------|------|---------------------------------|--------|
| CCRL1b | GRMZM2G034069 | 0.17 | At1g76470, At2g33600, At2g33590 | 4,375  |
| CCRL5a | GRMZM2G110881 | 0.21 | At5g58490                       | 519    |
| CCRL1c | GRMZM2G033555 | 0.33 | At1g76470, At2g33600, At2g33590 | 10,953 |
| CCR1b  | GRMZM2G131836 | 0.42 | At1g15950, At1g80820            | 853    |
| CCR1f  | GRMZM2G179981 | 0.86 | None                            | 12,097 |
| CCRL1e | GRMZM2G050076 | 2.35 | None                            | 1,861  |
| CCR1a  | GRMZM2G131205 | 2.66 | At1g15950, At1g80820            | 32,123 |
| CCRL5b | GRMZM2G107076 | 2.80 | At5g58490                       | 2,793  |
| CCRL1a | GRMZM2G009681 | 3.88 | At1g76470, At2g33600, At2g33590 | 2,524  |

|                                               |                  |       |                      |        |
|-----------------------------------------------|------------------|-------|----------------------|--------|
| CCR1g                                         | GRMZM2G168893    |       | None                 | 292    |
| CCR1h                                         | GRMZM2G004683    |       | None                 | 175    |
| CCR1e                                         | GRMZM2G146031    |       | None                 | 138    |
| CCR1c                                         | GRMZM2G099420    |       | None                 | 82     |
| CCRL1d                                        | GRMZM2G016836    |       | None                 | 57     |
| CCRL2                                         | GRMZM2G141350    |       | At2g02400            | 27     |
| CCRL1f                                        | AC234526.1_FG005 |       | None                 | 15     |
| CCR1d                                         | GRMZM2G017285    |       | None                 | 13     |
| CCRL1g                                        | GRMZM2G078480    |       | None                 | 10     |
| <b>Hydroxycinnamoyl-CoA Transferase (HCT)</b> |                  |       |                      |        |
| <b>HCTL9</b>                                  | GRMZM2G124066    | 0.10  | At1g27620            | 1,045  |
| SHTb                                          | GRMZM2G051005    | 0.18  | None                 | 613    |
| <b>ASFTa</b>                                  | GRMZM2G034360    | 0.29  | At5g41040            | 4,486  |
| <b>HCTL4b</b>                                 | GRMZM2G115422    | 0.31  | At5g01210            | 1,138  |
| <b>DCR</b>                                    | GRMZM2G179703    | 0.36  | At5g23940            | 2,312  |
| SHTf                                          | GRMZM2G156816    | 0.59  | None                 | 2,247  |
| SHTi                                          | GRMZM2G178769    | 1.29  | None                 | 752    |
| CHATh                                         | GRMZM2G050450    | 1.36  | None                 | 699    |
| <b>CHATc</b>                                  | GRMZM2G129266    | 1.54  | At5g17540, At3g03480 | 1,548  |
| HCTL4a                                        | GRMZM2G094017    | 2.38  | At5g01210            | 1,608  |
| SHTd                                          | GRMZM2G156296    | 2.60  | None                 | 1,712  |
| <b>HCTa</b>                                   | GRMZM2G158083    | 5.56  | At5g48930            | 9,089  |
| <b>HCTb</b>                                   | GRMZM2G035584    | 6.66  | At5g48930            | 36,861 |
| HCTL3b                                        | GRMZM2G156004    | 10.99 | At1g78990, At1g32910 | 2,534  |
| CHATk                                         | GRMZM2G107851    |       | None                 | 390    |
| HCTL4d                                        | GRMZM2G124815    |       | At5g01210            | 288    |
| HCTL7b                                        | GRMZM2G035023    |       | At5g38130            | 245    |
| SHTg                                          | GRMZM2G132678    |       | None                 | 224    |
| SHTj                                          | GRMZM2G107211    |       | None                 | 204    |
| HCTL7c                                        | GRMZM2G015793    |       | At5g38130            | 201    |
| SHTc                                          | GRMZM2G131165    |       | None                 | 112    |
| SHTe                                          | GRMZM2G177349    |       | None                 | 87     |
| CHATd                                         | GRMZM2G005046    |       | At5g17540, At3g03480 | 79     |
| SHTg                                          | GRMZM2G176446    |       | None                 | 59     |
| HCTL3a                                        | GRMZM2G070468    |       | At1g78990, At1g32910 | 22     |
| CHATa                                         | GRMZM2G037591    |       | At5g17540, At3g03480 | 16     |
| CHATf                                         | GRMZM2G043154    |       | None                 | 16     |
| CHATI                                         | GRMZM2G154216    |       | None                 | 9      |
| HCTL7a                                        | GRMZM2G064969    |       | At5g38130            | 5      |
| SHTa                                          | GRMZM2G127251    |       | None                 | 5      |
| ASFTc                                         | GRMZM2G417382    |       | At5g41040            | 5      |
| HCTL4c                                        | GRMZM2G165192    |       | At5g01210            | 4      |
| CHATg                                         | GRMZM2G147908    |       | None                 | 4      |
| CHATE                                         | GRMZM2G151553    |       | None                 | 3      |
| CHATb                                         | GRMZM2G122503    |       | At5g17540, At3g03480 | 2      |
| ASFTb                                         | GRMZM2G168499    |       | At5g41040            | 0      |
| CHATi                                         | GRMZM2G063139    |       | None                 | 0      |
| CHATj                                         | GRMZM2G446652    |       | None                 | 0      |
| <b>p-Coumarate 3-Hydroxylase (C3H)</b>        |                  |       |                      |        |
| C3H1a                                         | GRMZM2G138074    | 1.26  | At2g40890            | 2,777  |
| <b>C3H1b</b>                                  | GRMZM2G140817    | 4.40  | At2g40890            | 20,305 |
| <b>Cinnamate 4-Hydroxylase (C4H)</b>          |                  |       |                      |        |
| <b>C4Hb</b>                                   | GRMZM2G147245    | 2.20  | At2g30490            | 4,222  |
| <b>C4Hc</b>                                   | GRMZM2G139874    | 3.06  | At2g30490            | 2,479  |
| C4Ha                                          | GRMZM2G010468    |       | At2g30490            | 140    |
| C4Hd                                          | GRMZM2G028677    |       | At2g30490            | 40     |
| <b>Ferulate 5-Hydroxylase (F5H)</b>           |                  |       |                      |        |
| <b>F5Ha</b>                                   | GRMZM2G100158    | 9.59  | At4g36220, At5g04330 | 1,594  |
| F5Hb                                          | GRMZM5G830329    |       | At4g36220, At5g04330 | 189    |
| <b>Caffeoyl-CoA O-Methyltransferase</b>       |                  |       |                      |        |
| CCoAOMT1a                                     | GRMZM2G127948    | 0.20  | At4g34050            | 865    |
| CCoAOMT1d                                     | GRMZM2G033952    | 0.38  | None                 | 1,139  |
| <b>OMTF3</b>                                  | GRMZM2G077486    | 0.68  | At3g61990, At3g62000 | 659    |
| CCoAOMT1c                                     | GRMZM2G004138    | 2.05  | None                 | 844    |
| CCoAOMT1e                                     | GRMZM2G332522    | 3.44  | None                 | 25,035 |
| <b>CCoAOMT1b</b>                              | GRMZM2G099363    | 5.16  | At4g34050            | 55,502 |
| <b>Caffeic acid O-methyltransferase</b>       |                  |       |                      |        |
| ASMT                                          | GRMZM2G082007    |       | At4g35150, At4g35160 | 232    |
| COMT1b                                        | GRMZM2G423331    |       | At5g54160            | 30     |
| COMT1a                                        | AC196475.3_FG004 |       | At5g54160            | 0      |
| <b>Cinnamoyl alcohol dehydrogenases (CAD)</b> |                  |       |                      |        |



|              |               |       |                             |        |
|--------------|---------------|-------|-----------------------------|--------|
| CADa         | GRMZM2G700188 | 0.78  | None                        | 8,104  |
| <b>CAD9a</b> | GRMZM2G090980 | 1.64  | <b>At1g72680</b>            | 3,672  |
| <b>CAD6</b>  | GRMZM5G844562 | 3.78  | <b>At3g19450, At4g34230</b> | 34,747 |
| CADb         | GRMZM2G118610 | 4.95  | None                        | 524    |
| CAD9c        | GRMZM2G167613 | 18.90 | <b>At1g72680</b>            | 3,077  |
| CADc         | GRMZM2G046070 |       | None                        | 325    |
| CAD9b        | GRMZM2G443445 |       | <b>At1g72680</b>            | 272    |

### Peroxidase Family

#### Group A

|              |               |       |                                        |        |
|--------------|---------------|-------|----------------------------------------|--------|
| <b>PRDA3</b> | GRMZM2G419953 | 0.13  | <b>At4g11290, At3g21770, At1g05260</b> | 883    |
| <b>PRDA2</b> | GRMZM2G136158 | 0.20  | <b>At2g39040</b>                       | 1,661  |
| <b>PRDA1</b> | GRMZM2G144648 | 0.82  | <b>At2g39040</b>                       | 852    |
| PRDA4        | GRMZM2G085967 | 4.12  | <b>At4g11290, At3g21770, At1g05260</b> | 32,834 |
| PRDA12       | GRMZM2G089895 | 10.83 | None                                   | 2,698  |
| PRDA11       | GRMZM2G410175 |       | None                                   | 173    |
| RCI3         | GRMZM2G320269 |       | <b>At5g15180, At3g01190, At1g05240</b> | 89     |
| PRDA5        | GRMZM2G448051 |       | None                                   | 34     |
| PRDA13       | GRMZM2G138450 |       | None                                   | 22     |
| PRDA6        | GRMZM2G070603 |       | None                                   | 7      |
| PRDA8        | GRMZM2G104109 |       | None                                   | 5      |
| PRDA7        | GRMZM2G370928 |       | None                                   | 2      |
| PRDA9        | GRMZM2G150780 |       | None                                   | 0      |
| PRDA10       | GRMZM2G055487 |       | None                                   | 0      |
| PRDA14       | GRMZM2G404676 |       | None                                   | 0      |

#### Group B

|       |               |  |                                                   |    |
|-------|---------------|--|---------------------------------------------------|----|
| PRDB8 | GRMZM2G127945 |  | None                                              | 65 |
| PRDB1 | GRMZM2G101221 |  | <b>At4g25980, At1g77100</b>                       | 59 |
| PRDB4 | GRMZM2G122816 |  | <b>At5g17820, At3g03670, At4g26010, At1g34510</b> | 39 |
| PRDB7 | GRMZM2G103169 |  | None                                              | 13 |
| RHS18 | GRMZM2G068699 |  | None                                              | 8  |
| PRDB3 | GRMZM2G061230 |  | <b>At4g25980, At1g77100</b>                       | 6  |
| PRDB5 | GRMZM2G063435 |  | <b>At5g17820, At3g03670, At4g26010, At1g34510</b> | 1  |
| PRDB6 | GRMZM2G116452 |  | None                                              | 1  |
| PRDB2 | GRMZM2G081928 |  | <b>At4g25980, At1g77100</b>                       | 0  |

#### Group C

|              |               |      |                  |        |
|--------------|---------------|------|------------------|--------|
| <b>PRX72</b> | GRMZM2G023840 | 0.27 | <b>At5g66390</b> | 2,591  |
| <b>PRDC3</b> | GRMZM2G089982 | 0.32 | <b>At5g66390</b> | 13,735 |
| PRDC4        | GRMZM2G041308 | 0.57 | <b>At5g66390</b> | 5,046  |
| PRDC5        | GRMZM5G843748 | 2.96 | <b>At2g22420</b> | 654    |
| PRDC1        | GRMZM2G069093 |      | None             | 27     |
| PRDC2        | GRMZM2G407740 |      | None             | 0      |

#### Group D

|               |                  |       |                                        |        |
|---------------|------------------|-------|----------------------------------------|--------|
| PRDD5         | GRMZM2G080689    | 0.05  | None                                   | 1,119  |
| PRDD6         | GRMZM2G405581    | 0.18  | None                                   | 866    |
| PRDD32        | GRMZM2G108153    | 0.41  | None                                   | 692    |
| <b>PRDD28</b> | GRMZM2G095404    | 0.64  | <b>At1g68850</b>                       | 1,046  |
| PRDD7         | GRMZM2G405459    | 0.94  | None                                   | 1,591  |
| <b>PRDD26</b> | GRMZM2G150893    | 1.00  | <b>At5g19880, At5g06730, At5g06720</b> | 3,473  |
| PRX52b        | GRMZM2G171078    | 1.02  | <b>At5g05340</b>                       | 1,339  |
| PRDD24        | GRMZM2G116846    | 1.71  | <b>At5g19880, At5g06730, At5g06720</b> | 5,143  |
| PRDD10        | GRMZM2G020523    | 1.85  | None                                   | 4,882  |
| PRDD15        | GRMZM2G126261    | 8.84  | None                                   | 11,769 |
| PRDD12        | GRMZM2G427815    | 54.86 | None                                   | 1,415  |
| PRDD17        | GRMZM2G042347    |       | None                                   | 420    |
| PRDD8         | GRMZM2G382379    |       | None                                   | 372    |
| PER12         | GRMZM2G103342    |       | <b>At1g71695</b>                       | 334    |
| PRDD1         | GRMZM2G471357    |       | None                                   | 296    |
| PRDD25        | GRMZM2G088765    |       | None                                   | 263    |
| PRDD23        | GRMZM2G117365    |       | None                                   | 241    |
| PRX52a        | AC197758.3_FG004 |       | <b>At5g05340</b>                       | 241    |
| PRDD13        | GRMZM2G133475    |       | None                                   | 198    |
| PRDD34        | GRMZM2G313184    |       | <b>At4g33420</b>                       | 184    |
| PER64         | GRMZM2G160327    |       | <b>At5g42180</b>                       | 87     |
| PRDD2         | GRMZM2G117706    |       | None                                   | 67     |
| PRDD11        | GRMZM2G025441    |       | None                                   | 47     |
| PRDD14        | GRMZM2G450717    |       | None                                   | 39     |
| PRDD20        | GRMZM2G116902    |       | <b>At5g19890</b>                       | 37     |
| PRDD31        | GRMZM2G108219    |       | None                                   | 19     |
| PRDD33        | GRMZM2G136525    |       | None                                   | 16     |
| PRDD22        | GRMZM2G116823    |       | <b>At5g19880, At5g06730, At5g06720</b> | 14     |

|                |                  |       |                                 |        |
|----------------|------------------|-------|---------------------------------|--------|
| PRDD16         | GRMZM2G015280    |       | None                            | 12     |
| PRDD27         | GRMZM2G033985    |       | At4g16270                       | 12     |
| PRDD29         | GRMZM2G108123    |       | None                            | 12     |
| PRDD21         | GRMZM2G130904    |       | At5g19890                       | 7      |
| PRDD3          | GRMZM2G035506    |       | None                            | 6      |
| PRDD4          | GRMZM2G380247    |       | None                            | 5      |
| PRDD9          | GRMZM2G443885    |       | None                            | 5      |
| PRDD30         | GRMZM2G108207    |       | None                            | 5      |
| PRDD19         | GRMZM2G129543    |       | At5q19880, At5q06730, At5q06720 | 3      |
| PRDD18         | GRMZM2G097934    |       | None                            | 0      |
| <b>Group E</b> |                  |       |                                 |        |
| APX5b          | GRMZM2G004211    | 0.06  | At4g35970                       | 1,962  |
| PRDE5          | GRMZM2G047456    | 0.25  | At5g14130                       | 1,704  |
| APX5f          | GRMZM2G014397    | 0.53  | At4g35970                       | 3,019  |
| APX5c          | GRMZM2G140667    | 0.56  | At4g35970                       | 16,585 |
| APX5e          | GRMZM2G054300    | 0.76  | At4g35970                       | 29,408 |
| PRDE15         | GRMZM2G080183    | 0.79  | None                            | 1,023  |
| APX5a          | GRMZM2G460406    | 1.32  | At4g35970                       | 12,502 |
| APX5g          | GRMZM2G006791    | 1.82  | At4g35970                       | 4,343  |
| APX5d          | GRMZM2G137839    | 1.94  | At4g35970                       | 68,200 |
| PRDE8          | GRMZM2G136534    | 4.88  | At5g14130                       | 9,499  |
| PRDE13         | GRMZM2G133434    | 35.68 | None                            | 692    |
| PRDE9          | GRMZM2G047656    |       | At5g14130                       | 201    |
| PRDE14         | AC210003.2_FG004 |       | None                            | 181    |
| PRDE2          | GRMZM2G442008    |       | At1g24110                       | 117    |
| PRDE1          | GRMZM2G408963    |       | At1g24110                       | 60     |
| PRDE10         | GRMZM2G176085    |       | At5g14130                       | 47     |
| PRDE4          | AC230013.2_FG002 |       | At2g34060                       | 40     |
| PRDE7          | GRMZM2G048775    |       | None                            | 9      |
| PRDE12         | GRMZM2G061776    |       | None                            | 7      |
| PRDE3          | GRMZM2G439422    |       | At1g24110                       | 3      |
| PRDE6          | GRMZM2G136042    |       | None                            | 0      |
| PRDE11         | GRMZM2G142011    |       | None                            | 0      |
| <b>Group F</b> |                  |       |                                 |        |
| PRDF3          | GRMZM2G010640    |       | At1g30870                       | 18     |
| PRDF1          | GRMZM2G150134    |       | At3g42570, At3g17070            | 3      |
| PRDF2          | GRMZM2G067096    |       | At4g33870                       | 3      |
| <b>Group G</b> |                  |       |                                 |        |
| PRDG4          | GRMZM2G104394    | 0.15  | None                            | 1,366  |
| PRDG1          | GRMZM2G341934    | 0.38  | None                            | 4,198  |
| PRDG3          | GRMZM2G061088    | 0.59  | None                            | 596    |
| PRDG9          | GRMZM2G394500    | 8.16  | None                            | 5,047  |
| PRDG7          | GRMZM2G135108    | 9.48  | None                            | 929    |
| PRDG6          | GRMZM2G450233    | 58.17 | None                            | 4,937  |
| PRDG5          | GRMZM2G107228    |       | None                            | 201    |
| PRDG16         | AC205413.4_FG001 |       | None                            | 171    |
| PRDG12         | GRMZM2G365774    |       | None                            | 86     |
| PRDG14         | GRMZM2G076562    |       | None                            | 47     |
| PRDG29         | GRMZM2G150731    |       | None                            | 19     |
| PRDG25         | GRMZM2G044049    |       | None                            | 17     |
| PRDG8          | GRMZM2G012263    |       | None                            | 17     |
| PRDG22         | GRMZM2G427954    |       | None                            | 14     |
| PRDG18         | GRMZM2G022740    |       | None                            | 10     |
| PRDG15         | GRMZM2G177792    |       | None                            | 8      |
| PRDG13         | GRMZM2G029479    |       | None                            | 7      |
| PRDG20         | GRMZM2G129935    |       | None                            | 7      |
| PRDG24         | GRMZM2G427937    |       | None                            | 5      |
| PRDG28         | GRMZM2G004984    |       | None                            | 5      |
| PRDG11         | GRMZM2G060721    |       | None                            | 4      |
| PRDG30         | GRMZM2G029144    |       | None                            | 3      |
| PRDG10         | GRMZM2G160062    |       | None                            | 1      |
| PRDG26         | GRMZM2G040638    |       | None                            | 1      |
| PRDG2          | GRMZM2G149273    |       | None                            | 0      |
| PRDG19         | GRMZM2G451097    |       | None                            | 0      |
| PRDG31         | GRMZM2G156257    |       | None                            | 0      |
| PRDG17         | GRMZM2G050829    |       | None                            | 0      |
| PRDG21         | GRMZM2G027217    |       | None                            | 0      |
| PRDG23         | GRMZM2G437207    |       | None                            | 0      |
| PRDG27         | GRMZM2G168073    |       | None                            | 0      |

## Laccases

|               |               |       |                                                |        |
|---------------|---------------|-------|------------------------------------------------|--------|
| Lac7h         | GRMZM2G141376 | 0.12  | None                                           | 3,427  |
| <b>Lac7b</b>  | GRMZM2G309594 | 0.57  | <b>At3g09220</b> , At5g01050, <b>At5g01040</b> | 2,060  |
| Lac5c         | GRMZM2G132169 | 0.68  | <b>At5g05390</b> , <b>At2g40370</b>            | 2,060  |
| Lac17a        | GRMZM2G072808 | 0.74  | <b>At5g60020</b>                               | 720    |
| Lac2b         | GRMZM2G146152 | 1.07  | <b>At2g29130</b>                               | 3,197  |
| Lac17b        | GRMZM2G447271 | 1.51  | <b>At5g60020</b>                               | 1,477  |
| <b>Lac17c</b> | GRMZM2G164467 | 4.54  | <b>At5g60020</b>                               | 7,999  |
| <b>Lac17d</b> | GRMZM2G072780 | 4.55  | <b>At5g60020</b>                               | 8,010  |
| <b>Lac2c</b>  | GRMZM2G367668 | 7.68  | <b>At2g29130</b>                               | 9,947  |
| Lac7d         | GRMZM5G842071 | 10.06 | <b>At3g09220</b> , At5g01050, <b>At5g01040</b> | 782    |
| <b>Lac2a</b>  | GRMZM2G305526 | 14.58 | <b>At2g29130</b>                               | 21,219 |
| Lac7j         | GRMZM2G163535 |       | None                                           | 401    |
| Lac5b         | GRMZM2G336337 |       | <b>At5g05390</b> , <b>At2g40370</b>            | 145    |
| Lac7k         | GRMZM2G064106 |       | None                                           | 118    |
| Lac5a         | GRMZM2G388587 |       | <b>At5g05390</b> , <b>At2g40370</b>            | 103    |
| Lac7g         | GRMZM5G870184 |       | None                                           | 94     |
| Lac3          | GRMZM5G814718 |       | <b>At5g07130</b> , <b>At2g30210</b>            | 55     |
| Lac7f         | GRMZM2G166857 |       | None                                           | 27     |
| Lac7c         | GRMZM2G094375 |       | <b>At3g09220</b> , At5g01050, <b>At5g01040</b> | 21     |
| Lac15a        | GRMZM2G169033 |       | <b>At5g48100</b>                               | 20     |
| Lac7a         | GRMZM2G400390 |       | <b>At3g09220</b> , At5g01050, <b>At5g01040</b> | 19     |
| Lac7i         | GRMZM2G386170 |       | None                                           | 8      |
| Lac15b        | GRMZM2G320786 |       | <b>At5g48100</b>                               | 4      |
| Lac7e         | GRMZM2G140527 |       | None                                           | 2      |
